# Supplementary material for: Evolution of the Tbx6/16 Subfamily Genes in Vertebrates: Insights from Zebrafish
Source: Oxford University Press journal article supplement (doi:10.1093/molbev/mss199), 2012-08-21
Supplement: mss199_Supplementary_Data.zip [file mss199_Supplementary_Data.zip]

# **Evolution of the *Tbx6/16* sub-family genes in vertebrates: insights from zebrafish**

## Supplementary Materials I

Daegwon Ahn, Kwan-Hee You, and Cheol-Hee Kim

**Figure S1.** Amino acid sequences of the T-box genes used in the phylogenetic analysis (in Figure 1 & Figure S3)

1) Human T-box genes with Genbank (mRNA) accession numbers

>TBX1 NM\_080646 (variant A)  
MHFSTVTRDMEAFATASSLSSLGAAGGFPGAASPGADPYGPREPP  
PPPPRYDPCAAAAPGAPGPPPPHAYPFAPAAGAATSAAAEEGPGASCAAAAKAPVK  
KNAKVAGVSVQLEMKALWDEFNQLGTEMIVTKAGRRMFPTFQVKLFGMDPMDYMLLM  
DFVPVDDKRYRYAFHSSSWLVAGKADPATPGRVHYHPDSPAKGAQWMKQIVSFDKLKL  
TNNLLDDNGHIIILNSMHRYQPRFHVVYVDPKRDSEKYAEENFKTFVFEETRFTAVTAY  
QNHRTIQLKIASNPFAGFRDCDPEDWPRNHRPGALPLMSAFARSNPVASPTQPSGT  
EKGGHVLKDKVEKAETSRNTPEREVELLRDAGGCVNGLPCPAECQPFNTQGLVAGRT  
AGDRLC

>TBX2 NM\_005994  
MREPALAASAMAYHFFHAPRPADFMSAFLAAQPSFFPALALP  
PGALAKPLPDPGLAGAAAAAEEAGLHVSAALGPHPPAAHLRSLKSLPEPEDEVE  
DDPKVTLEAKELWDQFHKLGTEMVITKSGRRMFPPFKVRVSGLDKKAKYILLMDIVAA  
DDCRYKFHNSRWMVAGKADPEMPKRMYPHPDSPATGEQWMAKPVAFHKLKLTNNISDK  
HGFTIILNSMHKYQPRFHIVRANDILKLPYSTFRITYVPETDFIAVTAYQNDKITQLKI  
DNNPFAKGFRDGTNGRREKRKQLTLPRLRYEEHCKPERDGAESDASSCDPPPAREPP  
TSPGAAPSPLRLHRAAEKSCAADSDPEPERLSEERAGAPLGRSPAPDSASPTRLTE  
PERARERRSPERGKEPAESGGDGPFGRLSLEKERAEEARRKDEGRKEAAEGKEQGLAPL  
VVQTDASAPLGAGHLPLGLAFSSHLHGQQFFGPLGAGQPLFLHPGQFTMGPGAFSAMGM  
GHLLASVAGGGNGGGGGPGTAAGLDAGGLGPAASAASTAAPFFPHLSQHMLASQGIPM  
PTFGGLFPYPITYMAAAAAAASALPATSAAAAAAAGLSRSPLGSRPRLRFSPY  
QIPVTIPPSTSLTTGLASEGSKAAGGNSREPSLPPELALRKVGAPSRGALSPSGSAK  
EAANELQSIQRLVSGLESQRALSPGRESK

>TBX3 NM\_005996 (variant 1)  
MSLSMRDPVIPGTSMAHYHFFLPHRAPDFMSAVLGHQPPFFPAL  
TLPPNGAAALSLPGALAKPIMDQLVGAAETGIPFSSLGPAHLRPLKTMEPEEEVEDD  
PKVHLEAKELWDQFHKRGTEMVITKSGRRMFPPFKVRCSGLDKKAKYILLMDIIAADD  
CRYKFHNSRWMVAGKADPEMPKRMYPHPDSPATGEQWMSKVVTFHKLKLTTNNISDKHG  
FTIILNSMHKYQPRFHIVRANDILKLPYSTFRITYLPETEFIAVTAYQNDKITQLKIDN  
NPFAGFRDGTNGRREKRKQLTLQSMRVFDERHKKENGTSDESSEQAAFNCFAQASS  
PAASTVGTSNLKDLCPSEGESDAEAEESKEEHGPEACDAAKISTTTSEPCRDKGSPAV  
KAHLFAAERPRDSGRDLKASPDSPSRHSPATISSSTRGLGAEERRSPVREGTAPAKVEEA  
RALPGKEAFAPLTVQTDAAAHLAQGPLPGLGFAPGLAGQQFFNGHPLFLHPSQFAMG  
GAFSSMAAAGPLLATVSGASTGVSGLDSTAMASAAAAQGLSGASAATLPFHLQQHV  
LASQGLAMSPFGSLFPYPITYMAAAAAASSAAASSSVHRHPFLNLNTMRPRLRYSPPYS  
IPVPVPDGSLLTTALPSMAAAAGPLDGKVAALAASPASVAVDSGSELNSRSSTLSSS  
SMSLSPKLCAEKEAATSELQSIQRLVSGLEAKPDRSRASAP

>TBX4 NM\_018488  
MLQDKGLSESEEAFFRAPGPALGEASAANAPEPALAAPGLSGAAL  
GSPPGPGADVAAAAAQTIENIKVGLHEKELWKKFHEAGTEMIITKAGRRMFPSYKV  
KVTGMNPKTKYILLIDIVPADDHRYKFCDNKWMVAGKAEPAMPGRLYVHPDSPATGAH  
WMRQLVSFQKLKLTNNHLDPFHGHIILNSMHKYQPRLHIVKADENNAFGSKNTAFCTHV  
FPETSFISVTSYQNHKITQLKIENNPFAGFRGSDSDLRVARLQSKYEPVVISKIMR  
QRLISPLSATPDVGPLLGTHQALQHYQHENGASQLAEPQDLPLSTFPTQRDSSLFY  
HCLKRRDGTNRHLDLPCKRSYLEAPSSVGEDHYFRSPPPYDQQMLSPSYCSEVTPREAC  
MYSGSGPEIAGVSGVDDLPPPLSCNMWTSVSPYTSYSVQTMETVPYQFPPTHFTATT  
MMPRLPTLSAQSSQPPGNAHFSVYNQLSQSVRERGSPASFPREGLPQGCERKPPSP  
HLNAANEFLYSQTFSLSRESSLQYHSGMGTVENWTDG

>TBX5 NM\_000192 (variant 1)  
MADADEGFGLAHTPLEPDAKDLPCDSKPESALGAPSKSPSSPQA  
AFTQQGMEGIKVFHLHERELWLKFHEVGTEMIITKAGRRMFPSYKVKVTGLNPKTKYIL

LMDIVPADDHRYKFADNKWSVTGKAEPAMPGRLYVHPDSPATGAHWMRQLVSFQKLKL  
TNNHLDPFPGHIIILNSMHKYQPRLHIVKADENNGFGSKNTAFCTHVFPETAFIAVTSYQ  
NHKITQLKIENNPFPAKGFRGSDDMELHRMSRMSKEYPVVPRSTVRQKVASNHSPFSS  
ESRALSTSSNLGSQYQCENGVSQDGLLPPNPYPLPQEHSSQIYHCTKRKEEECSTT  
DHPYKKPYMETSPSEEDSFYRSSYPQQQGLGASYRTESAQRQACMYASSAPPSEPVPS  
LEDISCNTWPSMPSYSSCTVTTVQPMDRLPYQHFSAHFTSGPLVPRLAGMANHGSPQL  
GEGMFQHQTSVAHQPVVRQCGPQTGLQSPGTLQPPEFLYSHGVPRTLSPHQYHSVHGV  
GMVPEWSDNS

>TBX6 NM\_004608

MYHPRELYPSLGAGYRLGPAQPGADSSFPALAEGYRYPELDTF  
KLDCFLSGMEAAPRTLAAHPPLPLLPAMGTEPAPSAPEALHSLPGVSLLENRELWK  
EFSSVGTEMIITKAGRRMFACRVSVTGLDPEARYLFLLDVIPVDGARYRWQGRWEP  
SGKAEPRLPDRVYIHPDSPATGAHWMRQPVSFHRVKLTNSTLDPHGHLILHSMHKYQF  
RIHLVRAAQLCSQHWGGMASFRFPETTFISVTAYQNQITQLKIAANPFAKGFRENGR  
NCKRERDARVKRKLRGPEPAATEAYGSGDTPGGPCDSTLGGDIRESDEQAPAPGEAT  
AAPAPLCGGPSAEAYLLHPAAFHGAPSHLPTRSPSFPEAPDSGRSAPYSAAFLELPHG  
SGGSGYPAAPPVFPAPHFLQGGPFPLPYTAPGGYLDVGSKPMY

>TBX10 NM\_005995

MAAFLSAGLGILAPSETYPLPTTSSGWEPRLGSPFFPSGPCTSSST  
GAQVAEPTQGQPKNPRVSRVTQLEMKPLWEEFNQLGTEMIIVTKAGRRMFPPFQVKI  
LGMDSLADYALLMDFIPLDDKRYRYAFHSSAWLVAGKADPATPGRVHFHPDSPAKGAQ  
WMRQIVSFDKLLTNNLLDDNGHIIILNSMHRYQPRFHVVVVDPRKDSERYAQENFKSF  
IFTETQFTAVTAYQNHRIITQLKIASNPFPAKGFRESLDLSDWPVAPRPLLSVPARSHSSL  
SPCVLKGATDREKDPNKASASTSKTPAWLHHQLLPPPEVLLAPATYRPVTYQSLYSGA  
PSHLGIPRTRPAPYPLPNIRADRDQGGPLPLPAGLGLLSPTVVCLGPGQDSQ

>TBX15 NM\_152380

MSSMEEIQVELQCADLWKRFDIGTEMIITKAGRRMFAMRVKI  
TGLDPHQYYIAMDIVPDNKRIRYVYHSSKWMVAGNADSPVPPRVYIHPDSLASGDT  
WMRQVVVSFQKLLTNNELDDQGHIIILHSMHKYQPRVHVIRKDFSSDLSPTKPVVGDG  
VKTNFNPETVFTTVTAYQNQQITRLKIDRNPFPAKGFDRSGNRNRTGLEAIMETYAFWRP  
PVRTLTFEDFTTMQKQGGSTGTSTSTSTGTPSPSASSHLLSPSCSPPTFHLAPNTF  
NVGCRESQLCNLNLSDYPPCARSNMAALQSYPLSDSGYNRLQSGTTSATQPSSETFMP  
QRTPSLISGIPTPSPPLPGNSKMEAYGGQLGSFPTSQFYVMQAGNAASSSSSPHMFEGG  
SHMQQSSYNFSLNHPYNLYGYNFPTSPLAASPEKLSASQSTLLCSPSPNGAFGERQ  
YLPSCMEHSMHMISPSFPNNQATNTCDGRQYGAIVPGSSSQMSVHMV

>TBX18 NM\_001080508

MAEKRRGSPCSMLSLKAHAFSVEALIGAEEKQQQLQKKRRKLGAE  
EAAGAVDDGGCSRGGGAGEKGSSEGEAALPPPAGATSGPARSGADLERGAAGGCED  
GFQQGASPLASPGGSPKGSPARSLARPGTLPSPQAPRVDLQGAELWKRFEIGTEMI  
ITKAGRRMFAMRVKISGLDPHQYYIAMDIVPDNKRIRYVYHSSKWMVAGNADSPV  
PPRVYIHPDSPASGETWMRQVISFDKLLTNNELDDQGHIIILHSMHKYQPRVHVIRKD  
CGDDLSPKIPVPSGEGVKAFFPETVFTTVTAYQNQQITRLKIDRNPFPAKGFDRSGRN  
RMGLEALVESYAFWRPSLRTLTFEDIPGIPKQGNASSSTLLQGTGNGVPATHPHLLSG  
SSCSPAFHGLPNTSQLCSLAPADYSACARSGTLNRYSTSLAETYNRLTNQAGETFA  
PPRTPSYVGVSSSTSVNMSMGDTGDTFSCPQTSLSMQISGMSPQLQYIMPSPSSNAF  
ATNQTHQGSYNTFRLHSPCALYGYNFSTSPKLAASPEKIVSSQGSFLGSSPSGTMTDR  
QMLPPVEGVHLLSSGGQQSFSDSRTLGLSLTLSSSQVSAHMV

>TBX19 NM\_005149

MAMSELGTRKPSDGTVSHLLNVVESELQAGREKGDPTKQLQII  
LEDAPLWQRFKEVTNEMIVTKNGRRMFVVLKISVTGLDPNAMYSLLLDFVPTDSHRWK  
YVNGEWWPAGKPEVSSHSCVYIHPDSPNFGAHWMKAPISFSKVKLTKNLGGGQIMLN  
SLHKYEPQVHIVRVGSAHRMVTNCSFPETQFIAVTAYQNEEITALKIKYNPFAKAFLD  
AKERNHLRDVPEAISESQHVITYSHLGGWIFSNPDGVCTAGNSNYQYAAPLPLPAPHTH  
HGCEHYSGLRGHRQAPYPSPAYMHRNHSPSVNLISSNNLQVFSGPDSTLSSTPHA  
SILSVPHNTGPIPGPSPYPCLTWISNGAGGSPGPGPEVHASTPGAFLGPNPAVTSPP  
SVLSTQAPTSAGVEVLGEPSTLSIAVSTWTAVASHPFAGWGGPGAGGHHSPSSLDG

>TBX20 NM\_001077653

MEFTASPKPQLSSRANAFSIAALMSSGGSKEKEATENTIKPLEQ  
FVEKSSCAQPLGELTSIDAHGEFGGGSGSSPSSSSSLCTEPLIPTPIIPSEEMAKIAC  
SLETKELWDKFHELGTEMIITKSGRRMFPTIRVSFSGVDPEAKYIVLMDIVPVDNKRY  
RYAYHRSSWL VAGKADPPLPARLYVHPDSPFTGEQLLKQMVSEKVKLTNNELDQHGHI  
IILNSMHKYQPRVHI IKKKDHTASLLNLKSEEFRTFIFPETVFTAVTAYQNQLITKLK  
IDSNPFAKGF RDSSRLTDIERESVESLIQKHSYARSPIRTYGGEEDVLGDESQTTPNR  
GSAFTTSDNLSLSSWVSSSSSFPGFQHPQSLTALGTSTASIATPIPHPIQGS LPPYSR  
LGMPLTPSAIASSMQGSGPTFPSFHMPRYHHYFQQGPYAAIQGLRHSSAVMTPFV

>TBX21 NM\_013351

MGIVEPGCGDMLTGTEPMPGSDEGRAPGADPQHRYFYPEPGAQD  
ADERRGGGSLGSPYPGGALVPAPPSRFLGAYAYPPRPQAAGFPGAGESFPPPADAEY  
QPGEYAAPDPRAGLYPGPREDYALPAGLEVSGKLRVALNNHLLWSKFNQHQTEMIIT  
KQGRRMFPFLSFTVAGLEPTSHYRMFVDVVLVDQHHWRYQSGKWVQCGKAEGSMGPNR  
LYVHPDSPNTGAHWMRQEVSFGLKLTNNKGASNNVTQMIVLQSLHKYQPRLHIVEVN  
DGEPEAACNASNTHIFTFQETQFIAVTAYQNAEITQLKIDNNPFAKGFRENFESMYTS  
VDT SIPSPPGPNCQFLGGDHYSPLLPNQYPVPSRFY PDLPGQAKDVVPQAYWLGAPRD  
HSYEA EFRAVSMKPAFLPSAPGPTMSYYRGQEV LAPGAGWPVAPQYPPKMGPASWFRP  
MRTLPMEPGPGGSEGRGPEDQGPPLVWTEIAPIRPESSDSGLGEGDSKRRRVSPYPSS  
GDSSSPAGAPSPFDKEAEGQFYNYFPN

>TBX22 NM\_001109878 (variant 1)

MALSSRARAFSVEALVGRPSKRKLQDP IQAEQPELREKKGEEEE  
EERRSSAAGKSEPLEKQPKTEPSTASSGCGSDSGYGNSSSELEEKDIQME LQGS ELW  
KRFDIGTEMIITKAGRRMFPSVRVKVKGLDPGKQYHVAIDVVPVDSKRYRYVYHSSQ  
WMVAGNTDHL CII PRFYVHPDSPCSGETWMRQIIISFDRMKL TNNEMDDKGHIILQSMH  
KYKPRVHVIEQSSVDLSQIQSLPTEGVKTF SFKETEFTT VTAYQNQQITKLKIERNP  
FAKGFRDTGRNRGVL DGLLETYPWRPSFTLDFKTFGADTQSGSSGSSPVTSSGGAPSP  
LNSLLSPLCFSPMFHLPTSSLGMPCEAYLPNVNLPLCYKICPTNFWQQQPLVLPAPPE  
RLASSNSSQSLAPLMMEVPM LSSLGVTNSKSGSSEDSSDQYLQAPNSTNQMLYGLQSP  
GNIFLPNSITPEALSCSFHPSYDFYRYNFSMP SRLISGSNHLKVND DSQVSFGE GKCN  
HVHWYPAINHYL

>TBR1 NM\_006593

MQLEHCLSPSIMLSKKFLNVSSSYPHSGGSELVLHDHPIISTTD  
NLERSSPLKKITRGM TNQSDTDNFPDSKDSPGDVQRSKLSPLVDGVSELRHSFDGSAA  
DRYLLSQSSQPQSAATAPSAMFPYPGQHGAHPAFSIGSPSRYMAHHPVITNGAYNSL  
LSNSSPQGYPTAGYPYPQYGHSYQGAPFYQFSS TQPLGVPGKAQVYLCNRPLWLKFH  
RHQTEMIITKQGRRMFPFLSFNISGLDPTAHYNIFVDVILADPNHWR FQGGKWVPCGK  
ADTNVQGNRVYMH PDSPNTGAHWMRQEISFGK LKLTNNKGASNNNGQMVVLQSLHKYQ  
PRLHVVEVNEDGTEDTSQPGRVQTFTFPETQFIAVTAYQNTDITQLKIDHNPFAKGR  
DNYDTIYTGCDMDRLTPSPNDSPRSQIVPGARYAMAGSFLQDQFVSNYAKARFHPGAG  
AGPGPGTDRSVPH TNGLLSPQQAEDPGAPSPQRWFVTPANNRLDFAASAYDTATDFAG  
NAATLLSYAAAGVKALPLQAAGCTGRPLGYADPSGWGARSP PQYCGTKSGSVLPCWP  
NSAAAAARMAGANPYLGEEAEGLAAERSPLPPGAEDAKPKDLS DSSWIETPSSI KSI  
DSSDSGIYEQA KRRRISPADTPVSESSSPLKSEVLAQRDCEKNCAKDISGYYG FYSHS

>T NM\_003181

MSSPGTESAGKSLQYRVDHLLSAVENELQAGSEKGDPTERELRV  
GLEESELWLRFKELTNEMIVTKNGRRMFV LKVNVSGLDPNAMYSFLLD FVAADNHRW  
KYVNGEWPVGGKPEPQAPSCVYIHPDSPNFGAHWMKAPVSFSKV KLTNKLNGGGQIML  
NSLHKYEPRIHIVRGGPQRMITSHCFPETQFIAVTAYQNEEITALKIKYNPFAKAF L  
DAKERSD HKEMMEEPGDSQQPGYSQGWLLPGTSTLCPPANPH PQFGGALS LPS THSC  
DRYPTLRSHRSSPYSPYAHRRNSPTYSDNSPACL SMLQSHDNWSSLGMPAHP SMLPV  
SHNASPPTSSSQYPSLWSVSN GAVTPGSQAAAVSNGLGAQFFRGS PAHYTPLTHPVSA  
PSSSGSPLYEGAAAATDIVDSQYDAAAQGR LIASWTPVSPSPM

>EOMES NM\_005442

MQLGEQLLVSSVNLPGAHFYPLESARGGSGGSAGHLPSAAPSPQ  
KLDLDKASKKFGSGLSCEAVSGEPAAASAGAPAMLSDTDAGDAFASAAAVAKPGPPD  
GRKGS PCGEEELPSAAAAAAAAAAAAAAAAATARYSMDSLSSERYYLQSPGPQGS ELAAPC

SLFPYQAAAGAPHGPVYPAPNGARYPYGSM LPPGGFFAAVCPPGRAQFGPGAGAGSGA  
GGSSGGGGPGTYQYSQGAPLYGPYPGAAAAGSCGGLGGLGVPGSGFRAHVYLCNRPL  
WLKFHRHQTEMIITKQGRMF PFLSFNINGLNPTAHYNVFVEVVLADPNHWRFGQGW  
VTCGKADNNMQGNKMYVHPESPNTGSHWMRQEISFGKLKLTNNKGANNNTQMIVLQS  
LHKYQPRHLHIVEVTEDEGVEDLNEPSKTQTFTFSETQFIAVTAYQNTDITQLKIDHNPF  
AKGFRDNYDSSHQIVPGGRYGVQSFFPEPFVNTLPQARYYNGERTVPQTNGLLSPQQS  
EEVANPPQRWLVPVQQPGTNKLDISSYESEYTSSTLLPYGIKSLPLQTSHALGYYPD  
PTFPAMAGWGGGRSYQRKMAAGLPWTSRTSPTVFSQDLSKEKVKEEIGSSWIETPPS  
IKSLDSNDSGVYTSACKRRRLSPSNSSNENSPSIKCEDINAEYSKDTSKGMGGYYAF  
YTPP

>MGA NM\_001164273 (variant 1)

MEEKQQIILANQDGGTVAGAAPTFFVILKQPGNGKTDQGILVTN  
QDACALASSVSPVKS KGKICLPADCTVGGITVTLDNNSMWNEFYHRSTEMILTKQGR  
RMFPYCRYWITGLDSNLKYILVMDISPVDNHRYKWNWRWEP SGKAEPHVLGRVFIHP  
ESPSTGHYWMHQPVSYFYKLKLTNNTL DQEGHII LHSMHRYL PRLHLVPAEKAVEVIQL  
NGPGVHTFTFPQTEFFAVTAYQNIQITQLKIDYNPFAKGFRDDGLNNKFPQRDGKQKNS  
SDQEGNNISSSSGHRVRLTEGQSGEIQPGDLDP LSRGHETSGKGLEKTS LNKRDFLG  
FMDTDSALSEVPQLKQEISECLIASSFEDDSRVASPLDQNGSFNVV IKEEPLDDYDYE  
LGECPEGVTVKQEETDEETDVYSNSDDDP ILEKQLKRHNKVDNPEADHLS SKWLPSSP  
SGVAKAKMFKLDTGKMPVVYLEPCAVTRSTVKISELPDNMLSTSRKDKSSMLAELEYL  
PTYIENSNETAFCLGKESENGLRKHSPDLRVVQKYPLLKEPQWKYPDISDSISTERIL  
DDSKDSVGDLSL GKEDLGRKRTTMLKIATAAKVVNANQNASPNVPGKRGRPRK LKCK  
AGRPPKNTGKSLISTKNTFPVSPGSTFPDVKPDLEDVDGVLFVSFESKEALDIHAVDGT  
TESSSLQASTTNDSGYRARI SLEKELIEDLKT LRHKQVIHPGLQEVGLKLNSVDPT  
MSIDLKYLGVQLPLAPATSFPFWNLGTGNPASPDAGFPFVSRTGKTNDFTKIKGWRGK  
FHSASASRNEGGNSESSLKNRS AFCSDKLDEYLENEGKLMETSMGFSSNAPTS PVVYQ  
LPTKSTSYVRTLDSVLKKQSTISPSTSYSLKPHSVPPVSRKAKSQNRQATFSGRTKSS  
YKSILPYPVSPKQKYSHVILGDKVTKNSSGII SENQANNFVVP TLDENIFPKQISLRQ  
AQOQQOQQOQGSRPGLSKSQVKLMDLED CALWEGKPRTYITEERADVSLTLLTAQAS  
LKTKEIHTIIRKRAPP CNNDFCRLGCVCS SLALEKRQPAHCRRPDCMFGCTCLKRKV  
LVKGGSKTKHFQRKAHRDPVFYDTLGEEAREEEEEGIREEEQLKEKKRKKLEYTIC  
ETEPEQPVRHYPLWVKVEGEVDPEPVYIPTPSVIEPMKPLLLPQPEVLSPTVKGKLLT  
GIKSPRSYTPKPNPVIREEDKDPVYLYFESMMTCARVRVYERKKEDQRQPSSSSSPSP  
SFQOQTSCHSSPENHNNAKEPDSEQQPLKQLTCDLEDDSDKLQEKSWKSSCNEGESSS  
TSYMHQRSPGGPTKLIBIISDCNWEEDRNKILSILSQHINSNMPQSLKVG SFIIELAS  
QRKSRGEKNPPVYSSRVKISMPSQCDQDDMAEKSGSETPDGPLSPGKMEDISPQVTD  
LDSVRERLHGGKGLPFYAGLS PAGKLVA YKRKPSSSTSGLIQVASNAKVAASRKPRTL  
LPSTNSKMASSSGTATNRP GKNLKA FVPAKRPIAARSPGGVFTQFVMSKVGALQOQK  
IPGVSTPQTLAGTKFSIRPSPVMVPTPVVSSEPVQVCSPVTAAVTTTTPQVFLENTT  
AVTPMTAISDVETKETTYSSGATTTGVVEVSETNTSTSVTSTQSTATVNLTKTTGITT  
PVASVAFPKSLVASPSTITLPVASTASTSLVVVTAASSSMVTPTSSLGSVP IILSG  
INGSPVVSQRPENAAQIPVATPQVSPNTVKRAGPRLLLLIPVQQGSPTLRPVSN TQLQG  
HRMVLQFVRSPSGMNLFRHPNGQIVQLLPLHQLRGSNTQPNLQPV MFRNPGSVMGIRL  
PAPSKPSETPPSSSTSSAFSVMNPVIQAVGSSSAVNITQAPSLSSSGASFVSQAGTL  
TLRISPPEPQSFASKTGSETKITYSSGGQPVGTASLIPLQSGSFALLQLPGQKVPVPS  
ILQHVASLQMKRESQNP DQKDETN SIKREQETKKVLQSEGEAVDPEANVIKQNSGAAT  
SEETLNDLSLEDGRDHLDEECLPEEGCATVKPSEHSCITGSHTDQDYKDVNEEYGARNR  
KSSKEKVAVLEVRTISEKASNKT VQNL SKVQHQLGDKVKEQQKGFDNPEENSSEFPV  
TFKEESKFELSGSKVMEQQSNLQPEAKEKECGDSLEKDRERWRKHLKGPLTRKCVGAS  
QECKKEADEQLIKETKTQENSDVFQOQEGISDL LGKSGITEDARVLKTECD SWSRIS  
NPSAFSIVPRAAKSRNGHFQGHLLLPGEQIQPKQEKKGGRSSADFTVLDLEEDDE  
DDNEKTDDSIDEIVVSDYQSEEVDDVEKNNCVEYIEDDEEHVDIETVEELSEEINV  
AHLKTTAAHTQSFQKPSCTHISADEKAAERSRKAPPIPLKLPDYWSDKLQKEAEFA  
YYRRHTANERRRRGEMRDLFEKLKITLGLLHSSKVS KSLILTRAFSEIQGLTDQADK  
LIGQKNLLTRKRNILIRKVSSLSGKTEEVVLKKLEYIYAKQQA LEAQKRKKMG SDEF  
DISPRISKQOEGSSASSVDLGQMFINNRRGKPLILSRKKDQATENTSPLNTPHTS ANL  
VMTPQGQLLTLKGPLFSGPVVAVSPDLLES DLKPQVAGSAVALPENDDL FMMPRIVNV  
TSLATEGGLVDMGGSKYPHEV PDSKPSDHLKDTVRNEDNSLEDKGRISSRGNRDGRVT  
LGPTQVFLANKDSGYPQIVDVSNMQKAQEF LPKKISGDMRGIQYKWESESRGERVKS  
KDS SFHKLKMKDLKDSSIEMELRKVTS AIEEAALDSSELLTNMEDEDDTDETLTSLN  
EIAFLNQQLNDDSVGLAELPSSMDTEFPGDARRAFISKVPPGSRATFQVEHLGTGLKE

LPDVQGESDSISPLLLHLEDDDFSENEKQLAEPASEPDVLKIVIDSEIKDSLLSNKKA  
IDGGKNTSGLPAEPESVSSPPTLHMKTGLENSNSTDTLWRPMPKLAPLGLKVANPSSD  
ADGQSLKVMPC LAPIAAKVGSVGHKMNL TGNDQEGRESKVMPTLAPVVAKLGN SGASP  
SSAGK

2) **Opossum (Monodelphis domestica) T-box gene** with Genbank (mRNA) accession number

>**Tbx16** XM\_001377868

MAPRGTPAPGPHSPISASLEDVDLWTEFYRVGTEMVITKSGRRM  
FPQCKIRLSGLVPYLKYVVLADFVSVDNFRYKWKADQWEVAGKAEPQLPGRSYIHPDS  
PAYGSHWMKEPVSFHKMKLTNNLTLDQHGHIILHSMHRYQPRFLVAQADDLFNVWCNLF  
QVFSFPQTVFISVTAYQNEQITKLIDNNPFAKGFREQGRKPRRFSPPGRGLTKERLRE  
LVSSPEPERSGLTKEDAADQAEARGGSGPVSSSRFSPLWGPRELNQTEGPPGEAAGTS  
PGPYPVYRVRVSEPGRPQITPGRNSEVRAGSGFGPGGSQAPTERLLHTSTPAEGP

3) **Zebrafish T-box genes** with Genbank (mRNA) accession numbers

>**tbx1** NM\_183339

MISAISSPWLTLQLSHFCDVAAFTTSSLSSLNTPGSYHLSPSPGD  
PYSHHESQFEPCPAAQHAYNYSGSNSAQAPAQGDSGTSNCSSSSSSSTPNKTLVKKNP  
KVANINVQLEMKALWDEFNQLGTEMIIVTKAGRRMFTFQVKIFGMDPMADYMLLMDFL  
PVDDKRYRYAFHSSSWLVAGKADPATPGRVHYHPDSPAKGAQWMKQIVSFDKCLKLTNN  
LLDDNGHIILNSMHRYQPRFHVVYVDPRKDSEKYAEENYKTFVFEETRFTAVTAYQNH  
RITQLKIASNPFAKGFRCDDPEDWPRNHRPGSLQIMSAFARTRNPMSSPPQNGTEKE  
DSRREYDRDPGSGNPLHSDPTHQLMSRVLSPALPVLGGLHAVPLTAGPRSPPHELRLDG  
HPQPPDTLHHHPYKYPATYEHYLGAKTRPSPYSPSIRGHGYHPHMNPTTANMYSATS  
APTNYDYGPR

>**tbx2a** NM\_001102384

MRDPVFTANAMAYHFFHAHRPADFPMSAFLAAQAQPSFFPALTLP  
PGLSKPLADHALSGAAEAGLHAALGHHHQAHLRSFKGLEPEEVEDDDPKVTLEAKEL  
WDQFHKIGTEMVITKSGRRMFPPFKVRVNGLDKKAKYILLMDIVAADDCRYKFHNSRW  
MVAGKADPEMPKRMYPHPDSPATGEQWMAKPVAFHKLKLTNNISDKHGFTILNSMHKY  
QPRFHIVRANDILKLPYSTFRTYVFPETDFIAVTAYQNDKITQLKIDNNPFAKGFRTD  
GNGRREKRKQLAMP SMRMYDDQCKVDRDGGSDSDSCEQT TGRDSVHSPTGPAT SPLK  
FTRSREDKNFNESDNELDQHDGDMIRVSSPEQRQPSPFSPRCEDRVKDRNLNLEKKGDY  
SDSRKENDSAF SIRHLDDKDKLDARNVKDQDSSKKEADSVGMSTVKDGFSPLMVQ TENP  
SHFSASHLQSLALSGLHSHFFNPLSSGQSLLFHPGQFAMTPSAFSTMGMGHL LASMS  
GASGLENGSLSSQSTSSPNPFFHLSQHMLASQGISMPFTFGGLLPYPYTYMAAAAAA  
SALPAGSAASSLSRNPFLNNT RPRLRFSYPYQIPMSFSQSSGLLTGIPSTMSAESESS  
KSGSRESSPMSEHSHKGTNGQNTGSPKSSGKDSINELQNIQRLVSGLEKHRDASPRS  
VSPK

>**tbx2b** NM\_131051

MRDPVFTGTAMAYHFFHAHRPTDFPMSAFLAAQAQPSFFPALTLP  
PGALT KPIPDHTLAGAAEAGLHPALSHHHQAHLRSLKSLEPEEEVEDDDPKVTLEAKD  
LWDQFHKLGTEMVITKSGRRMFPPFKVRINGLDKKAKYILLMDIVAADDCRYKFHNSR  
WMVAGKADPEMPKRMYPHPDSPATGEQWMAKPVAFHKLKLTNNISDKHGFTILNSMHK  
YQPRFHIVRANDILKLPYSTFRTYVFPETDFIAVTAYQNDKITQLKIDNNPFAKGFRTD  
TGNGRREKRKQLTLP SLRMYEDQCKVDRDGDSDASSEPTTGRDAGHSPPGVSSPLR  
FNRGSRDDKTCTDSEHEMDHQNDRCGSSSPAPKPSPSPFRSRSEDWGREKPIAEKKDD  
YPDSRKTSDSIFSIRNLEKDKLESRSRKDTDSSKKDTENSGISGSKDSFSPLMVQTES  
PSHFAGHLQSLALSGLHSHQFFNPLNTGQPLL FHPGQFAMAPGAFSAMGMGHL LASV  
SGAGGLENGSLSAQGTGSTPSPFFHLSQHMLASQGI PMPTFGGLFPYPYTYMAAAAA  
AASALPASSSTASSLSRNPFLSSSTRPRLRFNPYQLPVSI PQSTNLLTTGLPSGLNPS  
SESSKCGSREASVPVDHKNHGASQRNGSPKTTMKESINELQNIQRLVSGLESQRETSSP  
RDSPK

>**tbx3a** (currently tbx3) NM\_001101670

MRDPVIQSSMAYHFFLPHRGPEFAMSAMLGHQPPFFPALALPP  
NGSLSLPGALGKPIMEQLMGAAETGLHFSSLGHQAHLRPLKLTLEPEEEVEDDDPKVHL

EAKELWELFHKRGTEMVITKSGRRMFPPFKVRCTGLDKKAKYIILLMDIVAADDCRYKF  
HNSRWMVAGKADPEMPKRMYPHPDSPAETGEQWMSKVNFHKLKLTNNISDKHGFTILN  
SMHKYQPRFHVIRANDILKLPYSTFRITYVFPETDFIAVTAYQNDKITQLKIDHNPFAK  
GFRDTGNRREKRKQLALQSMRSYEEQQKKENGTSDDSSGEQASFKCFRQASSPAVST  
AGHNHLKDFCDSDEDSDEEDKDANAKEGPDSSKISTTTEDSKDQDAGLGKSVFGESDS  
SSGRRSEKTRADSRSPITLISSTTRSGEELKSPVREPAKTTDDCRTVSKENYMLTVQ  
TDGAHLNQNHLNFGFPPLAGQQFFNHLGGAHPFLHPSQFNMGGAFSNMAAGMGP  
ILAAVSSGGVGLDGSLLPSPSQTGTGAPMPFHLQQHVLASQGLAMSPFGGLFPYPYT  
YMAAAAAASSAASSSVHRHPFLSAVRPRLRSPYSLPSVPDSTLLTTAMQPMASGLE  
VKGDGMNTSPASAAALDSEVTSRSSGSVLSPKTCTEKDSSSELQSIQRLVSGLEPKPD  
RARSVSP

>tbx3b (new) XM\_002662004

MAYHHFIPASPTDFTISPMLGQQAQFFPVGYGHQQFANALQSSI  
RLALKESAAPALLSGRTRDPVQTPEDPVPVHLEGNELWGQFHKVGTGMVITKSGRRMF  
PAFKVRCSGFDRKARYIILLMDIVASDDYRYKFHNCRWMVAGKADPEMPKRMYPHPDSP  
STGEQWMSKAVTFHKLKLTNNISDKHGFTILNSMHKYQPRFHVIRANDVLKLPYSTFK  
TYVFPETEFIAVTAYQNEKITQLKIDNNPFAKGFRETGNRREKRKQMLHQRCEVEPK  
KASVLTDDSSFDQISSNYLIQENTNESDIDGFGDEKESNEVESIQSISQDEQNSREIS  
TTVQESKDDPNEEIGDRNPEINSKKQHSVEQPAHLPLDKKHAEQQKFAADVTASQKD  
SLARHFYFPTPGLINSRLPSHVLNLCQFNIVGTLPLLASEATGSWIPRRSNEGEGQ  
GYTTSVSSSQRLTGMQDLPPNFQQRMTSQGVLSAQGNIFPYPQDYMTTSAGSSSA  
ASYQVHRQPPFNISYRQCRPYVPVWVHGRKIPQTTSVLIPYGETDINEHASIATPG  
STLFLGLKANKDQNTRCQDL

>tbx4 NM\_130914

MLQEKASVVADEGMTVAQSGGRPELASDSSHLGLPTTPSNPQNN  
EPDQSIENIKVVLHRELWKKLHEAGTEMIITKAGRRMFPSYKVKVTGMNPKTKYILL  
TDIVPADDHRYKFCDNKWMVAGKAEPAMPGRLYVHPDSPATGAHWMRQLVSFQKLKLT  
NNHLDPFPGHIIILNSMHKYQPRHLIVKADENNAFGSKNTAYCTHVHETAFISVTSYQN  
HKITQLKIENNPFAKGFGRGSDGDLRVSRLQGDYFVISKNMVRQRLISSHGHLGKGL  
SAGVLSHPQVLSHYQYDSGVPLPNSDSQEALNSFTSSREPSLLYHCFKHRDNPRL  
ELGCKRPYLDTTSSAVSEEHYFRSPPSYDSSLSSHYPYCNEALGSREACMYGGLEGE  
GAVGTDDLPAAPSLNLCNMWASVQPYPRYGMQTVEMQYQFPTAHFNSTASAAMVSHHS  
PSMQRPHTPPDLVTFTTQVRPLPPTPSSASTSPSGSGHHDRHSSLFHRKAGSPLRSQ  
RDFGTGYSTHSPTSTREPAYQYQTLGLSSVGPWHTDS

>tbx5a NM\_130915

MADSEDTFRLQNSPSPDSEPKDLQNEGKSDKQNAAVSKSPSSQTT  
YIQQMGEGIKVYLHERELWTKFHEVGTEMIITKAGRRMFPSFKVKVTGLNPKTKYILL  
MDVVPADDHRYKFADNKWSVTGKAEPAMPGRLYVHPDSPATGAHWMRQLVSFQKLKLT  
NNHLDPFPGHIIILNSMHKYQPRIHIVKADENNGFGSKNTAFCTHVFPETAFIAVTSYQN  
HKITQLKIENNPFAKGFGRGSDDMELHRMSRMQSTKEYPVVPRSTVRQVRGSSQSPFSG  
DVQGLSATGAISSQYSCENSVSSTSQDLLPQSSSYHEHTQDYHCIRKKEVEDECPAGEH  
PYKKPYVESSSEDDHYRPLSYQSLSGLSGGAPYRPESSQRQACMYASAPQPEPVP  
SLEDISWPGVPPYVFPQMERLPYQHHSFSAHFASRQMPPEAHGMYASSVSHQCSPSGGIQ  
SPSAGLQGNEYLYAHGLQHTVPASVPHRAQRQHHA

>tbx5b NM\_001198771

MANPMFESLRACSGGNSPAMDFERDKDSGHHGRNKTGSPPLQTQ  
LSQQSMEGIKVYLHEKDLWAKFHDVTTEMIITKAGRRMFPSYKVKVTGLNPKAKYILL  
MDIISADEHRYKFADNKWSISGKAEPALPGRLYVHPDSPASGAHWMRQLVSFQKLKLT  
NNHLDPFPGHIIILNSMHKYQPRHLIVKADERNSTFGSSNTSFCTHSFAETTFIAVTSYQN  
HTITQLKIENNPFAKGFGRNDDIELHRMSRTPSKEYPLVPRSTARQRAAPPSPDCLSR  
SEYTVTQKPSPGFTCSDTSGDQSLTETPSIHDPYPLFSYQLSPDVAPSSMDTTQHQP  
CMYGGSQVGMEELRWASYSSTTYQSFSSAKEMSGTFVPPADLSQELYPQYTCEVGQV  
SHCMMTDFSLYACNRSFSQNNQPPNNWCGGS

>tbx6 NM\_131052

MNHLANNYGYYPQDCRTQYSRMNSAEAEELTSPLVHVSQDRELW  
DKFSSIGTEMLITKSGRRMFPSCKVTVTGLNPKVKYVIMDMVPFDNHKYKWNKDCWE  
VNGSSDPHLNRRFFIHPDSPAPGQKWMQYPISFHKLKLTNNTLNSNGLVVLHSMHKYQ

PRLHIVQSPDPCTPHNPGAYLRFTTFPEAAFIAVTAYQNQEITKCLKIDNNPFAKGFRDN  
GLNRKRFRDKGTQEMQDTRQVKLDTANECAAGMSQMVEDVDVSVSSSVDCRDTQNS  
SSVSLNPFISAFTNPSSAGGAAHQTHTLTSLSNRHFSSPRESNLNSVCAALPVSQLS  
TGHTSFSRLNPQETHHNSRPKIQLQPPHPSLQCHDLDPVRLPLPPKLSRVQLSESALRN  
LEMSPLSDCANPRPLTNILNRSCFRASFTPSGKLLPNPPQPEQFLRGSEREIYPVQVEY  
TDQQFTLNSQTEHRPHMRPLTEY

>tbx10 (new) XM\_002664501 with a modification

Note: Genbank entry for this gene has a slight mis-prediction of  
exon 4 (noted during the comparison with other fish sequences),  
which is corrected in this version.

MVLKVQSSAGAETPRHRSAGGFSCPQDDVSGRSCSKAPEVSSV  
RVQLEMQSLWRQFDQLGTEMIVTKAGRRMFPTFQVHISGMDPAEYVLLMDFIPVDDK  
RYRYAFHSSSWLVAGRGDVAAPGRVHFHPDSPARGAQWIKQTVSFDRCLKLTNNLLDDN  
GHMILNSMHRYQPRHLVVLVDRSRNSQRFARNFCTFSFPETRFIAVTAYQNHRTQL  
KIACNPFAGKFRADPEHRADLNRAASMGPTDPPALGLPWAEAAASRSRECRHSDTHL  
QPAVAGSVMDVASHTHLYTPAPVFFSLPGQWDVLTRAERDLTG

>tbx15 NM\_153664

MSDRRRSAAALSSRAHAFSVEALIGTNKKRKLRGWEEKLELSM  
ESLASNGQLGDGEDPANCLDIDPDSEASPGSDGEGLAERTSCSFGSPADLTSAACDPS  
PSASMEEIQVELQCADLWKRFDIGTEMIITKAGRRMFAMRVKIVGLDPHQYYIAM  
DIVPVDNKRYRYVYHSSKMMVAGNADSPVPPRVYIHPDSLASGDTWMRQVVSFCLKL  
TNNELDDQGHIIILHSMHKYQPRVHVIRKDFSSSELSPTKPVPTGEGVKTFSPETVFTT  
ATAYQNQQITRLKIDRNPFAGKFRDSGRNSPPYRTGLEAIMETYAFWRPPVRTLTFED  
FTNMQKQQGGSTGTSTSTSTGTPSPSGATHLLSPSCSPPTFHLAPNTFNVGCRSRL  
CNLGLSEYPVCARSNMAALQGYGGLADGSYGRQLTTGGAVASQAASESFLPQRTSSLI  
AAGMQGGAHGSLATGNSGSGSGGKMDAYGSQLASFASQLQYVMQAGASSASGSSAS  
SGSSSSSAHMFSGSHHVQQSTYNAFSLHNPYNLYGYNFPASPRLAASPEKPQGGLLC  
SSSSAGAFARQYLSNGGMSMHMIGNPTGSQQGAGSCDGRQYGSSSQMSMHMV

>tbx16 NM\_131058

MQAIRDLKHNFSLPPPPSMPGAGDSYHQGNIRMTLEDPELWRSF  
HEIGTEMIITKPGRRMFPHCKISLSGLVPYAKYILLVDMVPEDGLRYKWNKDKWEVAG  
KAEPQPPYRTYLHPDSPAPGSHWMKQPVSFLLKLTNNALDQHGHIILHSMHRYHPRF  
HIVQADDLYSVRWSVFQTFTFPETSFATAVTAYQNTKITKCLKIDHNPFAKGRDEGTNS  
KRRANRNLDPDERVAKKMSKDSEHSGSPQDVQPSSCEALDDEHAGRKELEVKAERYSPW  
GGACDRDSGHALRPESPLGSDHRDVYSSEQLVPGQNTYQPYRFHEYGKSPSPSSSSSV  
GGSSACGSAGRPSFESRVLDVATVPDTSSSKPSAPEFSLPPHPSAGHQEYAGVLNM  
AITQAKPGMLGTHPLYSHYSTEQSLGQWSGAAASQYPPPPPHHLPTEYSSQAVHHG  
YHHGNVGDWSQYPLFSYSCW

>tbx18 NM\_153665

MAEKRRSPCTMSLKAHAFSVEALIGTEKKRKLLEEDSENCFEEI  
NEVPRMTESQPSTGRTCPSTRSCEIDCTSDSEPEPEDVLLDSPQPASQGAQVLVQSA  
TSSGEEMRVDLQGSGLWKRFEIGTEMIITKAGRRMFAMRVKIAGLDPHQYYIAM  
IVPVDNKRYRYVYHSSKMMVAGNADSPVPPRVYIHPDSPASGETWMRQVISFCLKL  
TNNELDDQGHIIILHSMHKYQPRVHVIRKECGEELSPVKAVPTGDGVKAFTETVFTTV  
TAYQNQQITRLKIDRNPFAGKFRDSGRNRMGLEALVESYAFWRPSLRTLTFEDILGIT  
KQGAAGSHGVVGSSAHLSSSSSCPSPTFHLGSGAGPVCDYSTCSRTSHPLHRYGPSLS  
ADSYSRLTSPTADAFSTSRSTYVSGTESEAFSCTQTGLPIQIHSMPSTTSQLQYLMP  
GHAHNAFSTNQSTQGSYNGFRLHNPYGLYGNFSTSPRLATSPEKAAATQTSFLGSSP  
SGTLTDRQVLSTMDGLHMLSSSQNLFDSTLGLTSSSSQVTAHMA

>tbx19 (new) XM\_003198759

MKVEEDLRSGGTVSSGRGGNDCCITRLLSVVESELQAGREKGD  
TEKQLKVSLEDAELWRKFKEVTNEMIVTKNGRRMFVCLKVSVTGLDPNAMYSFLDFT  
PADGHRWKYVNGEWPAGKPEPHSHSCVYIHPDSPNFGAHWMKAPVSFNKVLTNKL  
GGGQIMLNSLHKYEPQIHIVRVGGSHRMVTNISFTDTQFIAVTAYQNEEITALKIKHN  
PFAKAFLDAKERSHPKNHLEPPVENQHMGIPHCGWFI SNPDSLCSASGGNFYPGGLP  
LTHHHHGYKHYPSLHGHAAPYPSPYLPRHHHRGHNTVSLSDNLSPGVQMFSGHESWT  
GVSPPGAAMLSMQPAPNSPGASSQYPCLTWTVSSCTVSSSPGGVVSLTHGQDEPADG



ASTSASPCSLQAHGPTGSDGSVDPANHSRVGGMSWASVTTHSF

>tbx20 NM\_131506

MEYTSSPKPQLSSRANAFSIAALMSSGKTKDKESEENTIKPLEQ  
FVEKSSCHPNLGDLPLETHSDFSSGGGTGSGAPLCTEPLIPTPGVPSEEKAKISCS  
LETKELWDKFHELGTEMIITKSGRRMFPTIRVSFSGVDPDAKYIVPMDIVPVDNKRYR  
YAYHRSSWLVLGAKADPPLPARLYVHPDSPFTGEQLSKQMVSEKVKLTNNELDQHGHI  
ILNSMHKYQPRVHIIKKKDHTASLLNLKSEEFRTFVFTETVFTCTAYQNQLITRLKI  
DSNPFAGKFRDSSRLTDIERESVESLIHKHSYARSPIRTYAGDEETLGEEGSAHSRG  
SAFTASDNLSSLSSWVTTTSGFSGFQHPQSLSAIDTSTASLASPLPHPIQGSLPPYSRL  
GMPLTPSALASSMQATGPTTFPSFHMPRYHHYFQQGPYAAIQGLRHSSTVMTPFV

>tbx21 NM\_001170599

MGGIGRNFYLNMLNGTDAQSFAKDAELSSHLHRHRDLSDFKMGI  
QDTRFYYQDSIPNGQESLTLPFHAEHHQSAGAQTGRFYAPAPLGSCFTSRSGTGHTY  
VPAGADAYSSANGKDVPSSADGYTASFQHGFPRAPMYSLPGLQVSGKTQVLLNNYPL  
WAKFHKYQTEMIITKQGRRMFPFLSFNITSLDPSAHYNIYVDVVLADQHHWRYQGGKW  
VQCGKAEGNMPGNRMYPHDPSPNTGTHWMRQEVSFGLKLTNNKGSSNNVAQMIVLQ  
LHKYQPRLHIVEVKEDGTEDPFLTQTFVFPETQFIAVTAYQNADITQLKIDHNP  
AKGFRDNYDTLYAPPDPDLRLTPSPTESQQLLSGSCYPHPYLSQYMSPLPQSRFYR  
EPVSMTPQPCPKDPTSSPHSRWYLSQAVPPNRLDFSAYETEYTSNSLYKFPPLQSSP  
HHPLSYSENPFSTGAVSSANPGAWTASGRPSPQYLNHPHHSKPTSSLSWFRVPSPA  
ASSSPATNSRFHASPSLLEPQRQPLLQDKSKESTEDTWIEAPSVKSVDSADSGLFEG  
GESKKRRVSPYTSSTENSPPNRSATCEKDNCS DAGYYGFYTH

>tbx22 NM\_001164461

MACEDLRKSAKERKPAGAEAVRKVRVDLQGS DLWKR FHEIGTEM  
IITKVGRRMFPSIRVKVHNLDPQQYSIAMDIMPMDSKKYRYVYHSSQWVIAGNTDHS  
CIPPHLYVHPDSPSCGENWMRQVISFDRVKLTNNELDDRGHIILKSMHKYRPRIHVIL  
HCPPECLSKRLLSLPADGVFTFSFPETQFTTVTAYQNQQITKLKIDRNPFAKGFERN  
GAVLDGILESYSWHSFPNGFKSLAMELQGRFCGSSASGITPSVSSAQAVHPTAFSSPQ  
CKLILPSSCFLAYRAYCSICLNNTGLRPMDLPLLTSLPVKKGDRCRSHWLYNSAGT  
SMHPIHNTLSGWASENENTASAFMSPHSYSFPISHRFSTDTTHHLKLAHSESTVLQMPM  
ISSIGYSP

>tbx24 NM\_153666

MLGVEMYPLGLALGPQRLSDCYRDRDVP LYPSTCEMAARALPPA  
LLKPHGNIDSPAAPQDSVRMELENAGLWKQFSTVGTETMIVTKKGRRMFPQLRVKLSGL  
NPSLRYILLLDIVPVDDSSRYRFQDNSWQVVGGAEARLPDRVFIHPDSPATGEHWQNR  
ISFHRAKLTNNTLDAQGYIILHSLHRYQPRVHVIEARDVLMWGRTQHSFTFPETQFIT  
VTAYQNNKITEKINSNPFAGKGFRENGMNCKKQREARLKRKITSSQEECLDIESCDPC  
DSTELLPQSVLDLPSSALSIMNTALPITDSGFHTEVSSHDPQTDSDQTLVLEQAFLTSE  
MPSSMESQQQTTSENN VNALMDETGMMDLSGYTSSFP TPQLSSHTSVPQSSSMYSV  
VSTTQSSDLELPQASSISSPHSMPAYSSIPSAEYPGVNSSTAMPASTTSLSDSYSSIS  
HSTSSHLLQSSSYHSLLPDQSQDNLSPHPTPTNPPFQSI PACQGTRLTIDSGQNQVDD  
GGLSSANATTPAVPNPTQTAFPPVPQPNNDPDPTSPSCQSLPQSALPYQQVVSQCNI  
PTPSPDNTTPTAFPPFPSEQSTPNSIMVSSNPNTTAFPPVPVQQQLNLSTSGPSSFPV  
SQSSGLNAIPNPVHPTTGSFSFPSTNAIHQGPMSVPNTLHPSTAYTFPSSLPKHTGP  
LPNPAPTSYFPPTPIPPGPHPLQSLTLSSCSISNTSQIQSTFPQSYHNPSFSHIPQ  
MANHSQITSQSFPPLQSSSAPQLLSQSSTHPQCPPPSNAYPAVAPTEIGTFPQLNSAT  
PYLPDVVLHPSILPSLDPLSSSAPP SLYNPFPSYSLRLCQDPRSSLHLPLRHIYRQP  
QHAHGQGSYFDLGGRTVF

>tbria (new) XM\_688029

MHLQQQLISPANKPVSLDNGFPHIIMTAAAGVERVSSSCSSGDA  
HEPPLKRPRSPSPNARETQDNGESENKPESSDPRTDFASEMFSYAGQHVV PALSGHYM  
SPQPVISSGLYSGMSYSYPQPYEQTYANAAVYSFPAVSGKAQVYLCNRALWFKFHRHQ  
TEMIITKQGRRMFCLTFNVSGLDPA GHYNI AVDVILADPNHWRFGGKWPVPCGKADT  
NVTGNRVYTHPDS PNTGAHWMRQEISFGKLKLTNNKGASSNNTQMIVLQSLHKYQPRV  
HVIEISKNEDEDTSDPDGVQTFTFPETQFISVTAYQNTDITQLKIDHNPFAKGFERN  
DTKYSMDNTDRLTSPDSPHSQLLPSSRYAMP S ALFQE QFVDSYTKSCFTTGTPERGLE  
FTNSIMTSNQTQESSVTSGQRWFVSSPSVPSYEADVDTAALLSYTTAGVKNL PFTSTG

GSSNSLDYYTSTAGWDSRGSLENGSKTISNLSGWVLDATLERSMQPNYLPDDRELMER  
SSLGVSaelrgkdvdstwttdtqssiksvdssdlrileeapkdldlsirpdseDQAED  
VQNRARNGIKESGFFHFDA

>tblb NM\_001115090

MLERCISPALARSKKCMIVGSGYPNAQASELALQDYPIISIGD  
NLERSSPLKKNSAGMTNQSEADNFADSKDSSGDVQRGKLSPLDGVADSRHTFDGSAG  
ERYLLSQSSQVQPSPTTMFPYPYQHGPTHAFSIAFPSRYMAHHPVITNGAYNSLLSN  
SSPQGYATAGYPYAQQYGHAYQGTAFYQFSSAQAGLVPGKAQVYLCNRALWLKFHRHQ  
TEMIITKQGRRMFPFLSFNISGLDPTAHYNIFVDVILADPNHWRFGGKWPVPCGKADT  
NVTGNRVYMHDPSPNTGAHWMRQEISFGKLKLTNNKGATNNTGQMVVLQSLHXYQPRL  
HVQVNEDEGTEDTSQPGRVQTFTFPETQFIAVTAYQNTDITQLKIDHNPFAKGFRDNY  
DTVYTGCDIDRLTPSPGDSPRSQIMPSARYAMTGSFLQDQFVSSYAKSRFHPGVGGAP  
GTDERSVPLSNSLLSPQQTEETTVA SPQRWFVTPANNRLDFAASAYDAAAAADFAGNAA  
TLLSYAAAGVKALPLPGAGCSNRPLGYYGEPGWGTRTPPQYCSKSSSVLSCWPSNSV  
GSRTTASSYLVPGLDGDPIAPERSPLGGADESKPKDLSSESWIETPSSIKSIDSSDS  
GIFEQAKRRRISPSATPVSETSSPLKSEMLTPRECEKNCSKDIDIGYYSFYPHS

>ntl-a NM\_131162

MSASSPDQRLDHLLSAVESEFQKGSEKGDASERDIKLSLEDAEL  
WTKFKELTNEMIVTKTGRRMFPVLASVTGLDPNAMYSVLLDFVAADNNRWKYVNGEW  
VPGGKPEPQSPSCVYIHPDSPNFGAHWMKAPVSFSKVKLSNKLNGGGQIMLNSLHXYE  
PRIHIVKVGGIQKMISSQSFPETQFIAVTAYQNEEITALKIKHNPFAKAFLDAKERSD  
HKEVPDHSTDNQSGYSQLGGWFLPSNGPMGPSSSPQFNGAPVHSSGSYCYERYSSLR  
NHRAAPYP SHYSHRSTTTNNYMDNSSGSLASHDSWALQIPNSSGMGTLAHTTNTSN  
TSQYPSLWSVAGTTLTPSGSASGSI TGGLTSQFLRGSSMSYSGLTSSLPVSSPSSMYD  
PGLSEVGVGDAQFESSIARLTASWAPVAQSY

>ntl-b XM\_001343597

MDSGDCPEKNIQFRVDHLLTAVENELQAGSEKGDPTERELKVAL  
DENELWQKFALTNEMIVTKNGRRMFPVLKVNISGLDPNAMYSFLLDFVPADNHRWKY  
VNGEWPVGGKPEPQAPSCVYIHPDSPNFGAHWMKSCVFSKVKLTNKLNGGGQIMLNS  
LHXYEPRIHIVRVGGPQRMITTHAFPETQFIAVTAYQNEEITSLKIKYNPFAKAFLDT  
KERSDHKEIIEDVSESQQSGYSQLSSWFLPSAGSLCPSANPHAQLNSALSLSLSTSHGCE  
RYSTLRGHRSA PYPSTYAHRTASPTGYSDSSSCLSMPLSHDNWSSLQMSHSSVLP MG  
HSSGPNSNTS QYTSLWSVGNSSQSGSMSSSLGSQFLRG SAGHYSSLAHPLTAPSSGSP  
LYDTAASEASEYDTAAHTRLPTAWTHVAPPSL

>eom-a NM\_131679

MQLESILPGASVNLPKTFYNLSSSSSESTNNSPGSTQIDFQDMDR  
TDSEQSSGAKKFLMDDADSEFTGTAAAAATAAPDARKSSPVIGADDELSSTRRYNI  
DDLGTDRYFISSSQSPSSDVANPCSLFPYGGQTGSVYSGSNGSRYSSSLHYGSVLP PAG  
FSSAVCASRSQFGGGYQFGQGPGLYPSYPGPGSSLSMPIPGSGSAAARQVYLCNRP  
LWLKFHRHQTEMIITKQGRRMFPFLSFNITGLNLTAHYNVFEIVLADPNHWRFGGK  
WVTGKADNNMQGNKVYVHPESPNTGAHWMRQEISFGKLKLTNNKGANNNTQMIVLQ  
SLHXYQPRLHIVEVTEDEGDVEDMSSEAKTQTFTFPENQFIAVTAYQNTDITQLKIDHNP  
FAKGFRDNYDSMYTAPESDRLTPSPTDSPRSHQIVPGARYAMQPFQDQFVNNLPQNH  
RFYGSERAVPQTNGLLSPQSEDS AAGSASAQRWFGVPVQQSGATTKLDLSYDSEYSAS  
SLLPYGIKPLPLQSPHALGYYPDSAFASMAAGWSSRSSYQRKMTTGLPWSRPSPPAY  
TDDLSSKDKLQDENSTAAPTAASTGPWMEAPPVLKSVDSGDTSGYSMAKRRRVSPG  
GSSTDASPTIKCEDLSSEEYNKESHKAMGYAFYTSP

>eom-b NM\_001083575

MPGEGSSSGSALSSHPEAEEEEKVSPVVCDDLSRYLLDGLSSS  
RYFMQTQDSPSPCSLFPYSGQTGAVYAGSDGSRYASLHYGSVLP SAGFCQSLCAGRG  
DFSPGYHQFGHAAGNGYSPYQSGSGAVALPSAALRAQVYLCNRPLWLKFHRHQTEMI  
ITKQGRRMFPFLSFNMTGLSLSAHYNVFEIVLADPNHWRFGGKWPVTCGKADNNMQG  
NKIYMHPESPNTGAHWMRQEISFGKLKLTNNKGANINTSQMIVLQSLHXYQPRLHIVE  
VSDDRSERDSNTQIFSFENQFIAVTAYQNTDITQLKIDHNPFAKGFRDNYDSMYTLP  
DRERLTPSPADSPRAQQMVPNARYAVQPFLEQFSSLTQRSVTQPSSVEDPAQRWLIS  
QNSSKLELTAYEGEYSSSLLPYSFKSLPLQSYYPDTAFSWGTRVSAGSSFPRKLPSGL  
PWSRPSPTDFSEDPEKAREENSPFCWMEKPSDAAEPSIYSVVC SKRRRLSGDAPPGK

TEEQNFHKDSPSAAKAIGYYAFYTSS

>mga-a (currently mga) NM\_001170739  
MADTEKQGAMVLHEEGVTAPTLPPTTTPPSIFVVLKQLQSSDS  
GNDKANLMAISEANKMGKSSIGTTVAGIQPTSSTFADTNSTTPSENLPADARCRGITV  
TLDNNNMWNEFHRCRCKTEMLTKQGRRMFPYCRFRLSGMEPFQNYVLAMDIKPADNCRY  
KWSGKGWEPNGKAEPHISRLFVHPESPASGLHWMQYPVSFYRLKLCNTLDQEGHIIH  
SMHRYLPQIHIIIPADKVS KDILIDRPNVVTLSFAQTEFFAVTAYQNLCTITQLKIDYN  
PFAKGFREDAVNARSSKAKNGLSTDETESELKLSKEMTTLNNLKTLMKRKASVKVNV  
NQNVPNPTNGENKVVNGAAPVDNTNVQSLCNKKRPSSSAFSDFIKGAHVKKVRLSLEN  
INKTGGAETPSTACTSKQKEAADISSITENSLQVDQKDGNGAGDVLRCSTDTSLKTG  
VLKANEIKKEIDEHSAKDNTLKSSDQNLSCSDEKKMETVSSSLTEAKPDAQMKKTLPH  
KRPERVPLPLLAHLKQRRPILPKPVSHSSSLDSEKSCEPAQTSESSSVLMSFIPCVT  
TNLDSQPAVTSLSQTVTSSTTDANNMTSLSTTSLYSSTTVPLIPSETQLCDRFSASPV  
GSDPFSAPNTTSPSKPNSNPALDISNNTDAIFTDPHDNTLRSQSDISSDSTCDVVHDS  
CPPTVNTDVTETPVVPSPTS VFDVPSSTDNDMNSYQDINSMPDVAEGDISDCLLDSS  
TGSCPEFFSEEIPQNTLFTNEESLSLPLDDASSPAFSLPSPAPSSPDPFPPSLFCDRS  
VPPRKALDSFPERLLDCTAASARDPFLGFFNDGREPPRQIFDLPERPLIGTVASRES  
LSSSVNNGPEHPMETGDLFSQSHCPDRANSLNDLESAASCETAVSDNSISKPTKPSPH  
GSSCKKYKGKQKVGTLKLGEDSEVFDGPVPVPLQPSLEDVEGQLFVSFMSKKALRIH  
LGDDDDDKPETAQENTDNP DGNNEEKIEKKIEGLEKVLLHDLKFMKNRQVIHPVLQEV  
GLKLNLLDVTLEIDLQYLGVLPIPPALSP EETSSQAQFVSRTGKTSDFITQIKWRD  
KFAPSASLSEGVSTSDAGQSNLSAFCSMDLDEYLASEGKLIDERAASLSQADCTPVAY  
QLPTKSTSYVRTLDSVLKKQVPAILTPTTNKVKPTFKSKVENKSKKPLKPGKGKQTKP  
VISDAEPLCTKKPQQNKKYKSRKEFKSPEKPDVAEVPASNTTPMAEDSGSTSSTCAGG  
RSPGLPKTLVKLLDVEDGAVWEGRHRYSYTEERAAIALATLVTAEGASTGSADAIRII  
RRRAPCLNVFCRLGCVCASLVHLRRHHHC GKPCMLGCSCLRKVVALKTPKQEEGT  
ADDSDPQGMSEENKAKWRKKNMKRTYVLTDP ELAPEPAKRVSTLWDRTRGNFDKEVL  
YCPPPRSPQPQLLSQELQHDLESFLSPSKQKRVEERNLSTSEDNIEINLTCARSRPF  
HSNCHDKPKADDNKHHSIQVSTPDIEEGELVPLNLSGPAKRLEMMSERTWTSIDMRNN  
VMRIVCEHMAQDRNLQPFWMGKYFIKPVSKTLEKEENG SVEIYKVIISQPV EKKTENE  
KITQKEEELEKHVKTSEVKG LPLFLSKCCPAGLLKAEKKSPDAPGQIMVNGKHYPQAKL  
ELGHMGALHPANRLAAYITGRICPTVSAITKPPVTTVPSSLTTLTVSKVTCTPASTTS  
VSKSLGGSTLTSTTSASSPGLTSPAKKTVYITVASRNTGLSNSGTQIKKIVSPTGPPQ  
TSGQKMLLQVVKTAGNTLYRNPNGQLMQLVPLSQIKALKPNLLSQGQPTIIRLPAPP  
TVSMNKPQGGSATIVTSSIPTTQTLAKPSGTVPVSTSSSMGGKLISPPSSKSVLSL  
PSTLVVQGFGLQSGTCTLRILPPTTSTSTVLSQSGLTLLKSASSMPPTQDSSNSET  
NVSFSSQSTTEKTVVQLKQSTIDPAKQNSSDNANVKEKHFNKAPDPEEKEIGSDSTEL  
TDDSDLYSDDQEDASCMSASDREEKIEDTDGMDSEKKGYAEMVVDIETIEESAEQNR  
IAKFRASALRRNQYRRNQKRIHDEMLEVRVQKVRKERKRRQTLXECFIKLQGTLMSS  
KKFEVSRMRILTKANKEVEYLVKLEDYLVEKKAKLQFKKERYIQTLSQLCDKSTESIG  
LKLNEIISKQKALEAQSKTKETHPKPIQAKSKAKPKPSKPSKVVDVCDKPKGLAVQ  
NKVNDVSKVTYSPSKPIDLSIKKQKSP EMTESVPKSTPSVSPADLDGNKNTLNVLDT  
NTVTTTSTPIQPSFNSTLVMKPVSIPIKHPPITRERM RPNIILSRASSQAMQGSVPK  
ESLLTNVCIPQVLPLMNTMVP CNPIITINNSLQPIGITSVVGQSSSTPGVASVSIVPTI  
SHPLRVENTLPLHLPQFIKITNSPVNINTKVDSASLPNISNVISLAENLVVPRKVVED  
KPVFQAQPTSVDNQQNSSNDKIPDLEQKTDEAPSTNVPKQSVVEDQKGASVPKSNPEV  
PENKSPDDSDDPEDENLLSLLDELVLLSQQLTNEDEDERIAVPGDVQSCSDKPEDQEP  
ADDRALSPLFLTLEDLMSPD SKDEIDIPKVDDL VKVIFGSDSPSVSSESGVAQSTN  
ASSPHASTCNATGDGLTPPPLLHMKAA YEASRQSANEGTSVTWRPMPKLVPLGLKAQ  
DAGKVINPSIPNLDSSEQDTPQM

>mga-b (new)  
Note: The full-length sequence of this gene is not known.  
This clone is a composite sequence made from the following  
three sequences from Ensembl & Genbank databases:

XM\_002667174  
ENSDART00000125698  
XM\_002661949

MFEHPAAMEITAEGMLGNHDTVKCTNPADSGAL

VSTEGRPSRVIEATLENESVWSRFHSLGTEMLLTPQGRRMFPCCRFRLRGLDPDLQYFLL  
MDIAPLDDLHRHFNGEAWE PDGPGEAHLQSPVCFHPDSPA VGQHWMDSPVSFYTVKLTHD  
SCEREGVLLQPMHRYQPRLYVAPVSACLERAVPLKSPNVHMF TFPKTEFYAVTSYQNPQI  
TRLKIDCNPFMLAFREDETSARLIQNKLKALTPARTHTAKYTADNHTTSDGEQHLRKSC  
RLIVNLNVRCVCFMTCRLHSELKHSHTKESFVRFKHEGIDSNDSTIFLKSATKVNTA  
NNDSSSDGEQYLSQQDSIRLTVRFS SLKQQKLNKHQLINENKLENNSM TNIYKR NKYLLI  
QLSNIYSTFRSNSSTTLIIIIINQYKLLPKTYFLKSKCYIYLTSSLKNKAKSNNDKTYN  
GNNLNTLITTFCCGTVNHQQPHDFICVAFKFVLLLKIKNIFD FNSKVNANCLSPNKISV  
NQHFNTKAGNKLSSKPKFLKTFEVFNLSQKEKNLRSDEDLTFKLSMCSKAGRRPLSRGQ  
RVVLRPRPRPMKRGKKARAKWTRVKNVQALLDHRKRMQSISTHTDVCMPDLEDVEGVLF  
VSFTAKEALDVHVGNMRS SVGSSSPPPSPSISPSSHTQQLSACVTDPPVTEADRISELE  
LALLQDLKESKRNRI LHPALQKAESGFVSR TGKTNDLTRIKGWMEKFSLRSTSGTANSSA  
FCSEMLDEYLESEGGQRISERA E VFS SSSDPSPVVYQLPVRSSSYVRTLDSVLQMRTPSAA  
ATAPQQPSRRVAKRMRI SPVRVVS RPVALPQPAVYSAGVGRVRSRRGRKRRRPHISFNRD  
AVDGAQPSCTEKHTQLRTLEE QAL THGQIHTFISTERARVSL SALLTAQSVLVETPQWST  
HIADDGACAKLFCRLGCVCDLSRESAGSTHCRVCEMFSCTCFKHKILLIRSADHSQSV  
RSLQTLHPDPEGRPAPAARVTRLWERSAEESDPEPMSTPKPAGALRPAPRTHTHTHYTL  
TPRGRPPANRPNAQVPM EKDPVYLYLESMMTCARVREYNSNPPQVHILPAKKSSDEAL  
SDTSLNPSKRPHAAQSPDKPEPTKVL EII SGCNWESQSRSVLKELFQRVQNTNLP SVLS  
LDDYTVKLLSEHLKKDGRSMITYKVCVSLSDKEKSAQKECVQKECVEKERVQKERGKEP  
ALKPVPLLCGVM TAGHLKAQRRAPDLHCPIQVNGRTYAQAKLT LGRMGSLHPANRLAAYV  
TGRIKSFVPSRTRTTAASRRSKYTATRANHSTDVFKK PATQRLSIPRPPGGIRFPKVRRI  
LNALAPPLSAA DRVVPASALPPGQQVVLQPVAGMSGVNMCQFNGQM IQLVPVSAAPMQI  
QTSTTHSSGGASQEPQSSQLPANTALPFIIPRIHSVPGRNGFTFASAAAPGVQNNLLNK  
TGTFSEFRICPPSAESQSPAPTGA PQGSVTASTLILPGGYKLIKLINPAEKPDQNNPAEEP  
DQTI PAEEP DQNKPT EKPDQNNPTKYPDQNNPTEKPAQNNPAEKPDQNNPTDKPDQNKPT  
EKPAQNNPAEKPDQNNPTEYPDQNNPTEEPAQNNPAEKPDQNNPTEKPDQGNPTEEPDQD  
NPTEEPDQTI PAEEPAQNNPTEKPDQDNPGKKPDQDNPT EEPDQNNPTEEPDHNNPAEK  
DQDNPT EKPDHNNPAEKPDQDNPT EKPDHNNTEPDQTI PAEEPDQTNPT EKPDQDNPT EE  
PDQDNPT EEPDQTI PAEEPDQNNPGKKPDQDNPT EKPDQNNPAEKPDQNNPAMEPDQDN  
TEKLEQNNPAEKPDQDNPAMEPDKNPAEKPDQNNPAEKPDQNNPAEKPDQNNPTEKLEQ  
NKPT EKPDQDNPT EEPDQNNPAEKPDQNNPAERVENSSQSSVCVKVEPAEAEEDITQSAH  
KPPALIKTEPEHIQIPQLTNDGGTAKFTIKIEDAEADESV PQQQSRRKEEPFQFGGFSFE  
GLTNSAFSRLSFAVSPPAEPGEPDGSVQKSLDWLWRGRADV DTHAELSEKPPQNGTLMY  
SSDGCTTEDSMEQLSEGEVDIETFEENDQII SRLREKARRKIQSRVPPPPPSRQLKV K  
VKSC TAHPVRLMSDLLLYRRTRRLNQPIREKRRQLELLQSERTLRRTMCMVREQSISTEEL  
LHQACELITSLEDHSRFLIEEKRALMRQHSHYQTLICISQASGRFLHDSHIGPSGCCIM  
PEHDHCTVNDDDDDDMSD

#### 4) **Amphioxus T-box genes** with Genbank (mRNA) accession numbers

>**Amphi-Tbx1/10** XM\_002611831  
MEANSPLSPKANAFS IASLISASEQGGLMSDLHGKDQGLDDGQ  
DWGMQYSSIPREMEASCMLSNQRM PGHQLAHMTEHPSAFGVTQARGEAYDIPGMDSCR  
NGGGLPNGNENNNLLNDGVKDERKQNP KVANVKVLMEMKALWDEFHELGT EMIVTKAG  
RRMFPTFQVKMFGLEPMSDYILLMDFVPVDDKRYRYAFHSSSWLVAGKADPDMPRRIH  
VHPDSPAKGAQWMKQIVSFDKLLKTNNLLDDNGHII LNSMHRYQPRFHV VYIDGKKGD  
SDTVHENYKTFIFPETKFTAVTAYQNH RITQLKIASNPF AKGFRDCPD DDWRTLT FHG  
RNESDSVVEVL TQIPPSQRPRNHHRPSSLQLVGVT RTRTVGQMNTSQDQERRDRQEDT  
SQQCQSSPIVSRVLS PNLAGGGMHVNLQRPEQTALAH TSLPDNSYKYHYNGYMAAKTR  
PTPYPLPSMRPTGYHPVNNSLYAPCTRSSPYDLD

>**Amphi-Tbx2/3** XM\_002598876  
MAYHPFLAASKALDFPMPSFLAQ PGLFPGMPLLP SGAGHLGMPK  
LSDPSPGQTPADVSKALGGAGSVLRPI PQQQDDSDPQVELEYKDLWDQFHTYGT EM  
VITKSGRRMFPSFKVKVSGLDKRAKYIFLMDIVAADD CRYKFHNSRWMVAGKADPEMP  
KRM YIHPDSPATGEHWSKTVSFHKLKL TNNISDKHGFTI LNSMHKYQPRFHI VKTND  
IMKLPHYCHFRTYVFRETA FIAVTAYQNEKITQLKIDHNPF AKGFRD TGAGRRGEK RKH  
LHTFGHQHPGFLEE GHSSDLETVD CGDTVTEKEPRLSRPPLSPKEPASPVVEGSPSV  
GANYRTEPGSRPFATCSGDEGSEQQERPASLH THKGNCTETNKS AQECHRRDAPPHCG  
NEIRPGTAALREGEERGAHGGGGASDKENGEHHHNEKTESQQQQQREKNLEKKAVHHN  
NKESSEKSESNNNNKLPTSSSLSPLSAMNPGSSHMGR IHPSQLQGLASMPYPYQLLS

GGHGLPNRPFFLFHPSQLAMSGGGMPQFPMNPFLAFFVPHSGMNGATQPLSSPTHPLL  
ASQGYFFFGMSPQGYTALLDGSIFNPGFSFPQAAELHKRAMAGARHPLRFSPYPLSAT  
STTMVTTGSPVVCPIPSRTDASSSSDAPRESPSSSSSPGVRKNTSPKRASSPPTRTS  
VSAPEVSSSELQNIQKLVSGLEKQQEQQLAVETLTKLTEQSKLQ

>Amphi-Tbx4/5 EU084005/XM\_002598875  
MSGDLKESVGDERPRQREPD RKDDGPPGADDRTDGVPEGLEDVK  
VELQDAGLWQRFHKAGTEMIITKAGRRMFPSIKVKVTGLQPKTKYIFVMDIVAVDSHR  
YKFNESKWSVAGKAEPAMPGRVVFVHPDSPATGTHWMKQVVCFQKLKLTNNYMDTFGHI  
MLNSMHKYQPRLHIVQASENNKFELKKTCTFRTFIFPETEFMAVTSYQNHQITQLKIEH  
NPPFAKGFRGGDDTEFSRSARKSINYPVIPSNNPVQASLLPRGRPNNNYACSSNMAADT  
CPSLSSNHYQQTAGYNTVPIGSSIQMTTQENSGGCMQNSFSGGTDLGPLPKRACREE  
DRLLSDNSVATSTLTWSNPQILPNMENLQPLNRETCTMFANSATGDTTSSLLAAPQPL  
DPLSTAFNNNQNFSSVPFSSSGTGFSVANGGMNFLPSCSYAQMPPQGLGMNGTPFLHE  
VSRNVGCPMQIPQ

>Amphi-Tbx6/16 XM\_002611967  
MMYESEDVLTQARAFSINNMLTGSPHAFPPGFFPMAQAAPAPP  
PDPCAFSDRFATDFHMTADHKTQRLGLGLHLPAPQNFPPPSALKDMKVTLEQKDLWDSF  
HDIGTEMIITKAGRRMFPTYKASISGLDPNAKYILLMDIVPMDDNRYKYHNSEWVVS  
KAEPMLPGRLYIHPDSPATGTQWMKQSVTFHKLKLTNNAMDDQGHIIILNSMHKYQPRL  
HIVQANDVYSLRWNSFTFAFPETSFIAVTAYQNEKITQLKIDNNPFAKGFRDNGGNR  
RERAIVSTKRSADAAGEPGDSVSNKRPCTGGEQPERNNRPPSCDCSGVGEESDVPRGP  
SQYNPPAQADDLNP CGNPLTIVTDDIATDFAKERSPGVPHALGGQGSAAALPTRDQAAL  
GSCQGEDMRCQTRTACAQDPRDLLASPDADYHQYHPGGYSGQAAGDPTDSTVVPLG  
YGTGPSFQELSVQTDLGTAADMASACKNDVGLNAPGTAVLPSYPAVSSFHTGLPVS  
NPLYASGGTTPPQRSYDVYPTGLFAAPTAYEPLDYATTCKMAGFSRMQMSVAPAPHL  
SHFPTSSATSMFPVNFHGMFNTHPMPAAYPGHAGKFAA

>Amphi-Tbx15/18/22 XM\_002599011  
MAEKRKSAPVTLSSRAHAFSVEALLGPRVKKQRTAQFHSSREDA  
PEDNVLENFSTSDGRQEDRAAEQSSSALGSIQALQSRLAYPLPQPDGPDQVRVELQ  
GKDLWSRFHDIGTEMIITKAGRRMFPAIRTKVTGLDPKAQYIVIMDIVPVDNKRYRYVYH  
SSKWMCAGSADAPPPRVYVHPDSPASGEAWMRQTVSFDKCLKLTNNENDEQGYIILHS  
MHKYQPRVHIIKKTAHTDLTNKTSISPSDKAQTFAPFETVFTTVTAYQNQQITRLKID  
RNPFAKGFRDGRNRSGLCEIMDSYALWHPNAGRPLTYGQYTSMKSQEEEEKLMSGMLQ  
PPSPPTAFYLA PNFTFNVGCREGQACLTPEYQEPSQRTSINKENVSADLPSPD  
SPRLAHPQCSATGSMCRHPLMPESPALPHPDYVRQTATQPPSIPYQYLPSSPHFSQTTLSPT  
QHSPLLGA PYPSPRNCSAGSSPHSYLPISPSSTSGTSSCPTTSHLSPTFTSATFPHPY  
FNNLQVLPTSALPTSALPTSALPTSAPSGSYLHGQYRLAVHRIPSPQASLV

>Amphi-Tbx20 jgi|Brafl1|221929|e\_gw.90.81.1  
Note: The Genbank entry for Amphi-Tbx20 (XM\_002612304) has  
a possible error in exon prediction such that the first 19  
amino acids of the T-domain are missing. This entry is from  
the JGI website, which sports the full-length T-domain for  
this gene.  
MECNASPKPQLSSRANAFSIAAIMSSSCSTKKDSPEQAIKPLENFVEKSGCAQPLCGE  
ASSAETTTDGGRAGRESSAAESRQESASTEPAPSDGSHLQNKESPELKNVQCKLESK  
ELWDKFHELGTEMIITKSGRRMFPTIRVSFSGVDPDAKYIVLMDIIPVDNKRYRYAYH  
RSSWLIVAGKADPPQPARLYVHPDSPFTGEQLQKQIVSFEKLKLTNNELDQHGHIILNS  
MHRYQPRVHIIKKKEHTASLLNLNSEEKTFVVFQECMFTAVTAYQNQLITKLKIDSNP  
FAKGFRDSSRLTDIERESVETMLKEHRYARSPIRAYAEPEPRKSPRLSSSSSSGGLT  
SPSTSVGGWPSPSFTPLPHYPHSSHPIPIPHPINPSVTATTSSLTSPHPLPHTLG  
FGALGIPGLPHPTSALPAPIMLSAPSPFHPLHIQRYPYFPQTAYSSVHTLRHYV

>Amphi-Eomes/Tbx1/Tbx21 XM\_002589046  
MDAADVDDTAVGTD SFQPPGLSMPYGMSSGYTPPDSNSSRSSPG  
DGVD AELSRYSQVPPDYPLGHYPGATNPENAYSITSMTSPSPHYTNGYDQPPQMYGQQ  
PPGYFAPIESGPPQPPNGQYQHGYNGNYPYPGGGSMYGYPPGPPPTPAKLSVFLTNRD  
LWVKFHQHETEMIIITKQGRRMFPVLQFAISGLDPHAQYNVFDVMVLADVNHWKFQNGK  
WVPCGRADTNPQGSRVYVHPESPNSGAHWMKQEVVFSKLKLTNNKGADNGHVVLNSMH

KYQPRLHIIIEVSNRAGGGERVLSHSPFETQFIAVTAYQNTDITQLKIDYNPFAGKFR  
DNYDGPTNIRPNGFDRSAGMEPGMHPSLGGPLPLMPPIYPVGPPMPAHNRGIHLPYD  
MRSHSSGGSSSSPGSPMQPKDLELKETASDLPGSAQNGQSNATPEKQASPTRVNSN  
LLLTTPAYTVNSSGQPHYSMATMHSRGMPPRNGGLPQNGQVSENGNMAPNGHISQN  
GQSQGEARPEWRSPSKTRPSPGDEDDNRDAAAKRLRTEELPPYHDATPGNNYDVYDDQ  
PGDGTSSFGQQDHMQYHRYNGYYSANPEDYGHYYDRNAMQYGYGNQGYQASAHQF  
VDSEKFAHAHYNGAYHQAQYNGGYMPTSTASAETATGHY

>Amphi-Bra1 XM\_002590345  
MSSAETMKQPTAASPDQFSVSHLLSAVESEISAGSEKGDPTERD  
LKITLEEKPLWDKFNALTNEMIVTKNGRRMFVVKVNVSGLDPNAMYSFLLDFTAADN  
HRWKYVNGEWPVGGKPEPSVPSCVYIHPDSPNFGAHWMKSPVSFSKVKLTNKLNGGGQ  
QIMLNSLHKYEPRLHIKVGGPDPNQRMVSTHTFPETQFIAVTAYQNEEITALKIKYNP  
FAKAFLDAKERSDGKDGMEDLQDQPQYSQLGGWFLPGTGPICPPPNPHQFAPSLGLPS  
HGCDRYSTLRNHRSAFYHPYQRSSPPTNYGHDTAASLPMMPHDNWSGLPVSTHNML  
SMSAMPHTTTSTHAQYPNLWSVSNNLTPTTHAQTHMSGTMGTGLPHQFLRTTAPAPY  
HSIPTCTVPTTASSSPVYHDSHEVSSTDSDGYGHSTTPPAPQTRITSNNWSPMTPPSL

>Amphi-Bra2 XM\_002590344  
MKQTPDQFSVSHLLSAVESEISAGSEKGDPTERDLKVTLGEKPL  
WEKFKSLTNEMIVTKSGRRMFVVKVNVSGLDPNAMYSFLLDFTAADNHRWKYVNGEW  
VPGGKPEPSVPSCVYIHPDSPNFGAHWMKSPVSFSKVKLTNKLNGGGQQIMLNSLHKY  
EPRIHIVKVGGPDPNQRTLSTHTFAETQFIAVTAYQNEELTALKIKHNPFAKAFLDAKE  
RNDTKSGHDDLTDQQPQFSQLGGWFLPGTGPICPPPNPHQFAPSLGLPSHGCDRYSTL  
RNHRSAFYHPYQRSSPPTNYGHDTAASLPMMPHDNWSGLPVSTHNMLSMSAMPHTT  
TSTHAQYPNLWSVSNNLTPTTHAQTHMSGTMGTGLPHQFLRTTAPAPYHSIPTCTVP  
TTASSSPVYHDSHEVSSTDSDGYGHSTTPPAPQTRITSNNWSPMTMPSM

>Amphi-Tbx6d1 (new) XM\_002588055  
MSLSEKAQAFSIDSLAADPKTSEDGNEELSPMCDIVPSCGVS  
STGLNSDNFALHRSLGPPWGHGSLQSTGAAERDGLQGNMFPLTGEADRSPPPAATPR  
DVSSQEYGLPIAKTTHGVTVSLEKAGLWRQFQECGTEMILNRAGRMRFPVMTITGL  
DPSATYRVYMDVVPADGYRHKFTKTAWVATGPAEFSISNPPYEHPNSPASGAGWMGT  
VSFAKAKITNNNDSEGNFLLHSMHKYQTKIIISRQETDKKARSCLGDHTHTFQFEET  
AFVAVTAYQNRVTRLKIKNNPFAKAFRSDVMALVTFHLFHQGSWRAPDSLQEVTPV  
PTKRSMGIEVVAEHFVVTLLF

>Amphi-Tbx6d2 (new) jgi|Brafl1|86982|fgenes2\_pg.scaffold\_157000034  
Note: The Genbank entry for this gene (XM\_002611966) has a  
spurious exon in the T-box region. This entry is from JGI  
website and does not contain the spurious exon.  
MPCDQRSVLRETQRQCMYQKAASACSGMPTRPKVELEAENRKLWELFHQAGTEMIINTKG  
RCMFPTLTNLTLGLKPERRYIILVKMILTDESLYGRNNQWVVVNGDAKPSVADSIVVHP  
KCPEYGAKLMERPLAFAFKLSSRMHDGKNMVQLRSMHKYQPVVQVVEADNTTDLAVAPS  
WQFSFPVTEFMAVSSYSYDKIRKLKVDNNKFAKNLRNLESVDRRERSQGVPAVPRMVRP  
PAQKSPPPITCVLPPTTCGNSTQTASPTAADTHVSPKQGLVSRVQPRCIQQEMLGELYN  
PAEMEKLRAATTTMQAPMACTTAALHTQQISDIPLTQPLQPTALAYMRHFPVGPATFTPTS  
NDVVNPIAVRTKAQLKAYPTHMGYFPLPPGMVL

**Figure S2.** Alignment of the amino acid sequences of the T-domains used in the phylogenetic analysis (in Figure 1 & Figure S3). Sequences in masked regions (grey) cannot be reliably aligned and therefore were excluded from the analysis. Human and zebrafish gene names are written in all upper case (human) or in all lower case (zebrafish) letters. Mdom: *Monodelphis domestica* (grey short-tailed opossum). Amphi: *Branchiostoma floridae* (amphioxus). Sequences are given in an interleaved format.

|                      |                                                        |         |
|----------------------|--------------------------------------------------------|---------|
| TBX1                 | LWDEFNQLGTEMIIVTKAGRRMFPTFQVKLFGMDPMADYMLLMDFVPVDDKRYR | YAFHSSS |
| tbx1                 | LWDEFNQLGTEMIIVTKAGRRMFPTFQVKIFGMDPMADYMLLMDFLPVDDKRYR | YAFHSSS |
| TBX10                | LWEEFNQLGTEMIIVTKAGRRMFPTFQVKILGMDSLADYALLMDFIPLDDKRYR | YAFHSSA |
| tbx10                | LWRQFDQLGTEMIIVTKAGRRMFPTFQVHISGMDPAEYVLLMDFIPVDDKRYR  | YAFHSSS |
| Amphi-Tbx1/10        | LWDEFHELGTETMIITKAGRRMFPTFQVKMFGLPMSDYILLMDFVPVDDKRYR  | YAFHSSS |
| TBX15                | LWKRFDHIGTEMIITKAGRRMFAMRVKITGLDPHQYYIAMDIVPVDNKRYR    | YVYHSSK |
| tbx15                | LWKRFDHIGTEMIITKAGRRMFAMRVKIVGLDPHQYYIAMDIVPVDNKRYR    | YVYHSSK |
| TBX18                | LWKRFEHIGTEMIITKAGRRMFAMRVKISGLDPHQYYIAMDIVPVDNKRYR    | YVYHSSK |
| tbx18                | LWKRFEHIGTEMIITKAGRRMFAMRVKIAGLDPHQYYIAMDIVPVDNKRYR    | YVYHSSK |
| TBX22                | LWKRFDHIGTEMIITKAGRRMFPSVRVKVGLDPGQYHVAIDVVPVDSKRYR    | YVYHSSQ |
| tbx22                | LWKRFEHIGTEMIITKVGRRMFPSIRVKVHNLDPLQQYSIAMDIMPMSKKYR   | YVYHSSQ |
| Amphi-Tbx15/18/22    | LWSRFHDIGTEMIITKAGRRMFPARTKVTGLDPKAYIVIMDIPVDNKRYR     | YVYHSSK |
| TBX20                | LWDKFHELGTETMIITKSGRRMFPTIRVSFSGVDPEAKYIVLMDIVPVDNKRYR | YAYHRSS |
| tbx20                | LWDKFHELGTETMIITKSGRRMFPTIRVSFSGVDPDAKYIVPMDIVPVDNKRYR | YAYHRSS |
| Amphi-Tbx20          | LWDKFHELGTETMIITKSGRRMFPTIRVSFSGVDPDAKYIVLMDIIPVDNKRYR | YAYHRSS |
| TBX2                 | LWDQFHKLGTEMIITKSGRRMFPPFKVRVSGLDKKAKYILLMDIVAADDCRYK  | --FHNSR |
| tbx2a                | LWDQFHKIGTEMIITKSGRRMFPPFKVRVNGLDKKAKYILLMDIVAADDCRYK  | --FHNSR |
| tbx2b                | LWDQFHKLGTEMIITKSGRRMFPPFKVRINGLDKKAKYILLMDIVAADDCRYK  | --FHNSR |
| TBX3                 | LWDQFHKRGTEMIITKSGRRMFPPFKVRCGLDKKAKYILLMDIIAADDCRYK   | --FHNSR |
| tbx3a                | LWELFHKRGTEMIITKSGRRMFPPFKVRCTGLDKKAKYILLMDIVAADDCRYK  | --FHNSR |
| tbx3b                | LWGQFHKVGTEMIITKSGRRMFPFKVRCSGFDRKARYILLMDIVASDDYRYK   | --FHNCR |
| Amphi-Tbx2/3         | LWDQFHTYGTETMIITKSGRRMFPSFKVKVSGLDKRAKYIFLMDIVAADDCRYK | --FHNSR |
| TBX4                 | LWKKFHEAGTEMIITKAGRRMFPSYKVKVTGMNPKTKYILLIDIVPADDHRYK  | --FCDNK |
| tbx4                 | LWKKLHEAGTEMIITKAGRRMFPSYKVKVTGMNPKTKYILLTDIVPADDHRYK  | --FCDNK |
| TBX5                 | LWLKFHEVGTEMIITKAGRRMFPSYKVKVTGLNPKTKYILLMDIVPADDHRYK  | --FADNK |
| tbx5a                | LWTKFHEVGTEMIITKAGRRMFPSFKVKVTGLNPKTKYILLMDVVPADDHRYK  | --FADNK |
| tbx5b                | LWAKFHDVTETMIITKAGRRMFPSYKVKVTGLNPKAKYILLMDIISADEHRYK  | --FADNK |
| Amphi-Tbx4/5         | LWQRFHKAGTEMIITKAGRRMFPSIKVKVTGLQPKTKYIFVMDIVAVDSHRYK  | --FNESK |
| TBX6                 | LWKEFSSVGTEMIITKAGRRMFACRVSVTGLDPEARYLFLLDVIVPDGARYR   | --WQGRR |
| tbx24                | LWKQFSTVGTEMIIVTKGRRMFPLRVKLSGLNPSLRYILLLDIVPVDSSRYR   | --FQDNS |
| Mdom-Tbx16           | LWTEFYRVGTETMIITKSGRRMFQCKIRLSGLVPYLYKVVVLADFVSVDNFYK  | --WAKDQ |
| tbx6                 | LWDKFSSIGTEMLITKSGRRMFPSCKVTVTGLNPKVKYVIMDMVPFDNHKYY   | --WNKDC |
| tbx16                | LWRSFHEIGTEMIITKPGRRMFPHCKISLSGLVPYAKYILLVDMVPEDGLRYK  | --WNKDK |
| MGA                  | MWNEFYHRSTEMILTKQGRRMFPYCRYWITGLDSNLKYILVMDISPVDNHRYK  | --WNGRW |
| mga-a                | MWNEFHRCKTEMIITKQGRRMFPYCRFRLSGMEPFQNYVLAMDIKPADNCRYK  | --WSGKG |
| mga-b                | VWSRFHSLGTEMLTPQGRRMFPCCRFLRGLDPLQYFLLMDIAPLDDLHRH     | --FNGEA |
| Amphi-Tbx6/16        | LWDSFHDIGTEMIITKAGRRMFPTYKASISGLDPNAKYILLMDIVPMDDNRYK  | --YHNSE |
| TBX19                | LWQRFKEVTNEMIVTKNGRRMFVPLKISVTGLDPNAMYSLLLDVFPTDSHRWK  | --YVNGE |
| tbx19                | LWRKFKEVTNEMIVTKNGRRMFVPLKVSVTGLDPNAMYSFLLDFTPADGHRWK  | --YVNGE |
| T                    | LWLRFKELTNEMIVTKNGRRMFVPLKVNVSGLDPNAMYSFLLDFVAADNHRWK  | --YVNGE |
| ntl-a                | LWTKFKELTNEMIVTKTGRRMFPVLRASVTGLDPNAMYSVLLDFVAADNHRWK  | --YVNGE |
| ntl-b                | LWQKFKALTNEMIVTKNGRRMFVPLKVNISGLDPNAMYSFLLDFVPADNHRWK  | --YVNGE |
| Amphi-Bra1           | LWDKFNALTNEMIVTKNGRRMFVPLKVNVSGLDPNAMYSFLLDFTAADNHRWK  | --YVNGE |
| Amphi-Bra2           | LWEKFKSLTNEMIVTKSGRRMFVPLKVNVSGLDPNAMYSFLLDFTAADNHRWK  | --YVNGE |
| EOMES                | LWLKFHRHQTEMIITKQGRRMFPFLSFNINGLNPTAHYNVFEVVLADPNHWR   | --FQGGK |
| eom-a                | LWLKFHRHQTEMIITKQGRRMFPFLSFNITGLNLTAHYNVFEIVLADPNHWR   | --FQGGK |
| eom-b                | LWLKFHRHQTEMIITKQGRRMFPFLSFNMTGLSLSAHYNVFEIVLADPNHWR   | --FQGGK |
| TBR1                 | LWLKFHRHQTEMIITKQGRRMFPFLSFNISGLDPTAHYNI FVDVILADPNHWR | --FQGGK |
| tbr1a                | LWFKFHRHQTEMIITKQGRRMFPCLTFNVSGLDPAHYNIAVDVILADPNHWR   | --FQGGK |
| tbr1b                | LWLKFHRHQTEMIITKQGRRMFPFLSFNISGLDPTAHYNI FVDVILADPNHWR | --FQGGK |
| TBX21                | LWSKFNQHQTEMIITKQGRRMFPFLSFTVAGLEPTSHYRMFVDVVLVDQHHWR  | --YQSGK |
| tbx21                | LWAKFHKYQTEMIITKQGRRMFPFLSFNITSLDPSAHYNI YVDVVLADQHHWR | --YQGGK |
| Amphi-Eom/Tbr1/Tbx21 | LWVKFHQHETEMITKQGRRMFPVLQFAISGLDPAQYNVFDVMDVADVNHWK    | --FQNGK |
| Amphi-Tbx6d1         | LWRQFQECGTEMIILNRAGRRMFPPVMVTITGLDPSATYRVYMDVVPADGYRHK | --FTKTA |
| Amphi-Tbx6d2         | LWELFHQAGTEMIINTKGRCMFPTLTNLNLTGLKPERRYIILVKMILTDESLYG | --YRNNQ |

|                      |                                                                |
|----------------------|----------------------------------------------------------------|
| TBX1                 | WLVA-GKADPA-TP-GRVHYHPDSPAKGAQWMKQIVSFDKCLKLTNN---LLDDNGHIILN  |
| tbx1                 | WLVA-GKADPA-TP-GRVHYHPDSPAKGAQWMKQIVSFDKCLKLTNN---LLDDNGHIILN  |
| TBX10                | WLVA-GKADPA-TP-GRVHFHPDSPAKGAQWMRQIVSFDKCLKLTNN---LLDDNGHIILN  |
| tbx10                | WLVA-GRGDVA-AP-GRVHFHPDSPARGAQWIKQTVSFDRLKLTNN---LLDDNGHMIILN  |
| Amphi-Tbx1/10        | WLVA-GKADPD-MP-RRIHVHPDSPAKGAQWMKQIVSFDKCLKLTNN---LLDDNGHIILN  |
| TBX15                | WMVA-GNADSP-VP-PRVYIHPDSLASGDTWMRQVVSFDKCLKLTNN---ELDDQGHIIILH |
| tbx15                | WMVA-GNADSP-LP-ARLYVHPDSLASGDTWMRQVVSFDKCLKLTNN---ELDDQGHIIILH |
| TBX18                | WMVA-GNADSP-VP-PRVYIHPDSPASGETWMRQVISFDKCLKLTNN---ELDDQGHIIILH |
| tbx18                | WMVA-GNADSP-VP-PRVYIHPDSPASGETWMRQVISFDKCLKLTNN---ELDDQGHIIILH |
| TBX22                | WMVA-GNTDHLICII-PRFYVHPDSPCSGETWMRQIISFDRMKLTNN---EMDDKGHIILQ  |
| tbx22                | WVIA-GNTDHSCIP-PHLYVHPDSPCSGENWMRQVISFDRVKLTNN---ELDDRGHIIILK  |
| Amphi-Tbx15/18/22    | WMCA-GSADAP-PP-PRVYVHPDSPASGEAWMRQTVSFDKCLKLTNN---ENDEQGYIILH  |
| TBX20                | WLVA-GKADPP-LP-ARLYVHPDSPFTGEQLLKQMVSEKVKLTNN---ELDQHGHIILN    |
| tbx20                | WLVA-GKADPP-LP-ARLYVHPDSPFTGEQLSKQMVSEKVKLTNN---ELDQHGHIILN    |
| Amphi-Tbx20          | WLVA-GKADPP-QP-ARLYVHPDSPFTGEQLQKQIVSEKCLKLTNN---ELDQHGHIILN   |
| TBX2                 | WMVA-GKADPE-MP-KRMYIHPDSPATGEQWMAKPVAFHKLKLTNN---ISDKHGFTILN   |
| tbx2a                | WMVA-GKADPE-MP-KRMYIHPDSPATGEQWMAKPVAFHKLKLTNN---ISDKHGFTILN   |
| tbx2b                | WMVA-GKADPE-MP-KRMYIHPDSPATGEQWMAKPVAFHKLKLTNN---ISDKHGFTILN   |
| TBX3                 | WMVA-GKADPE-MP-KRMYIHPDSPATGEQWMSKVTFHKLKLTNN---ISDKHGFTILN    |
| tbx3a                | WMVA-GKADPE-MP-KRMYIHPDSPATGEQWMSKVNFHKLKLTNN---ISDKHGFTILN    |
| tbx3b                | WMVA-GKADPE-MP-KRMYIHPDSPSTGEQWMSKAVTFHKLKLTNN---ISDKHGFTILN   |
| Amphi-Tbx2/3         | WMVA-GKADPE-MP-KRMYIHPDSPATGEHWMKTVSFHKLKLTNN---ISDKHGFTILN    |
| TBX4                 | WMVA-GKAEPA-MP-GRLYVHPDSPATGAHWMRQLVSFQKLKLTNN---HLDPFGHIILN   |
| tbx4                 | WMVA-GKAEPA-MP-GRLYVHPDSPATGAHWMRQLVSFQKLKLTNN---HLDPFGHIILN   |
| TBX5                 | WSVT-GKAEPA-MP-GRLYVHPDSPATGAHWMRQLVSFQKLKLTNN---HLDPFGHIILN   |
| tbx5a                | WSVT-GKAEPA-MP-GRLYVHPDSPATGAHWMRQLVSFQKLKLTNN---HLDPFGHIILN   |
| tbx5b                | WSIS-GKAEPA-IP-GRLYVHPDSPASGAHWMRQLVSFQKLKLTNN---HLDPFGHIILN   |
| Amphi-Tbx4/5         | WSVA-GKAEPA-MP-GRVHVHPDSPATGTHWMKQVVCFQKLKLTNN---YMDTFGHIMLN   |
| TBX6                 | WEPS-GKAEPR-LP-DRVYIHPDSPATGAHWMRQPVSFHRVKLTNS---TLDPHGHLILH   |
| tbx24                | WQVV-GGAEAR-LP-DRVFIHPDSPATGEHWQNRTISFHRAKLTNN---TLDAQGYIILH   |
| Mdom-Tbx16           | WEVA-GKAEPQ-LP-GRSYIHPDSPAYGSHWMKEPVSFHKMKLTNN---TLDQHGHIILH   |
| tbx6                 | WEVN-GSSDPH-LP-NRFFIHPDSPAPGQKWMQYPISFHKKLKLTNN---TLNSNGIVVLH  |
| tbx16                | WEVA-GKAEPQ-PP-YRTYLHPDSPAPGSHWMKQPVSFCLKLTNN---ALDQHGHIILH    |
| MGA                  | WEPS-GKAEPH-VL-GRVFIHPDSPSTGHYWMHQPVSFYKCLKLTNN---TLDQEGHIILH  |
| mga-a                | WEPN-GKAEPH-I--SRLFVHPESPASGLHWMQYPVSFYRLKLCNT---LDQEGHIILH    |
| mga-b                | WEPD-GPGEAH-LQ-SFVCFHPDSPAVGQHWMDSPVSFYTVKLTHD---SCEREG-VLLQ   |
| Amphi-Tbx6/16        | WVVS-GKAEPL-MP-GRLYIHPDSPATGTQWMKQSVTFHKLKLTNN---AMDQQGHIILN   |
| TBX19                | WVPA-GKPEVS-SH-SCVYIHPDSPNFGAHWMKAPISFSKVKLTKN---LNGGGQ-IMLN   |
| tbx19                | WVPA-GKPEPH-SH-SCVYIHPDSPNFGAHWMKAPVSFKNVKLTNK---LNGGGQ-IMLN   |
| T                    | WVPG-GKPEPQ-AP-SCVYIHPDSPNFGAHWMKAPVSFSKVKLTKN---LNGGGQ-IMLN   |
| ntl-a                | WVPG-GKPEPQ-SP-SCVYIHPDSPNFGAHWMKAPVSFSKVLSNK---LNGGGQ-IMLN    |
| ntl-b                | WVPG-GKPEPQ-AP-SCVYIHPDSPNFGAHWMKSCVSFSKVKLTKN---LNGGGQ-IMLN   |
| Amphi-Bra1           | WVPG-GKPEPS-VP-SCVYIHPDSPNFGAHWMKSPVSFSKVKLTKN---LNGGGQ-IMLN   |
| Amphi-Bra2           | WVPG-GKPEPS-VP-SCVYIHPDSPNFGAHWMKSPVSFSKVKLTKN---LNGGGQ-IMLN   |
| EOMES                | WVTC-GKADNN-MQGNKMYVHPESPNTGSHWMRQEISFGKLKLTNNKGANNNTQMIVLQ    |
| eom-a                | WVTC-GKADNN-MQGNKVYVHPESPNTGAHWMRQEISFGKLKLTNNKGANNNTQMIVLQ    |
| eom-b                | WVTC-GKADNN-MQGNKIYMHPEPNTGAHWMRQEISFGKLKLTNNKGANINTSQMIVLQ    |
| TBR1                 | WVPC-GKADTN-VQGNRVYMHDPSPNTGAHWMRQEISFGKLKLTNNKGASNNNGQMVVLQ   |
| tbr1a                | WVPC-GKADTN-VTGNRVYTHDPSPNTGAHWMRQEISFGKLKLTNNKGASNNNTQMIVLQ   |
| tbr1b                | WVPC-GKADTN-VTGNRVYMHDPSPNTGAHWMRQEISFGKLKLTNNKGATNNTQMIVLQ    |
| TBX21                | WVQC-GKAEGS-MPGNRLYVHPDSPNTGAHWMRQEVSFGLKLTNNKGASNNVTQMIVLQ    |
| tbx21                | WVQC-GKAEGN-MPGNRMVYMHDPSPNTGTHWMRQEVSFGLKLTNNKGSSNNVAQMIVLQ   |
| Amphi-Eom/Tbr1/Tbx21 | WVPC-GRADTN-PQGSRVYVHPESPNSGAHWMKQEVVFSKLKLTNNKGA--DNG-HVVLN   |
| Amphi-Tbx6d1         | WVAT-GPAEFS-IS-NEPYEHPNSPASGAGWMGTVVSFAKAITNN---NDSVEGNFLLH    |
| Amphi-Tbx6d2         | WVVVN-GDAKPS-VA-DSVYVHPKCPYEGAKLMERPLAFPAKLSSR---MHDGKNMVQLR   |



|                      |              |                |                                       |                              |
|----------------------|--------------|----------------|---------------------------------------|------------------------------|
| TBX1                 | SMHRYQPRFHVV | YVDPRKD----    | SEKYAEENFKTFVFEETRFTAVTAYQNHRITQLKIAS |                              |
| tbx1                 | SMHRYQPRFHVV | YVDPRKD----    | SEKYAEENYKTFVFEETRFTAVTAYQNHRITQLKIAS |                              |
| TBX10                | SMHRYQPRFHVV | FVDPRKD----    | SERYAQENFKSFIFTETQFTAVTAYQNHRITQLKIAS |                              |
| tbx10                | SMHRYQPRLHV  | LVDRSRN----    | SQRFAHRNFCTFSFPETRFIAVTAYQNHRITQLKIAC |                              |
| Amphi-Tbx1/10        | SMHRYQPRFHVV | YIDGKKG----    | DSDTVHENYKTFIFPETKFTAVTAYQNHRITQLKIAS |                              |
| TBX15                | SMHKYQPRVHVI | RKDFSSDLSPTKPV | PGDGVKTFNFPETVFTTAVTAYQNQQITRLKIDR    |                              |
| tbx15                | SMHKYQPRVHVI | RKDFSSDLSPTKPV | TGEGVKTFSFPETVFTTAVTAYQNQQITRLKIDR    |                              |
| TBX18                | SMHKYQPRVHVI | RKDCGDDLSP     | IKPVPSGEGVKA                          | FSFPETVFTTAVTAYQNQQITRLKIDR  |
| tbx18                | SMHKYQPRVHVI | RKECGEELSP     | VKAVPTGDGVKA                          | FSFTETVFTTAVTAYQNQQITRLKIDR  |
| TBX22                | SMHKYKPRVHVI | EQGSSVDLSQ-    | IQSLPTEGVKTF                          | FSFKETEFTTAVTAYQNQQITKLKIER  |
| tbx22                | SMHKYRPRIHVI | LHCPPECLSK     | RLLSLPADGVTF                          | FSFPETQFTTAVTAYQNQQITKLKIDR  |
| Amphi-Tbx15/18/22    | SMHKYQPRVHII | KKTAHTDLTNK    | TISPSPDKAQTF                          | FAFPETVFTTAVTAYQNQQITRLKIDR  |
| TBX20                | SMHKYQPRVHII | KKKDHTA---     | SLNLKSEEFRTF                          | IFPETVFTAVTAYQNQLITKLKIDS    |
| tbx20                | SMHKYQPRVHII | KKKDHTA---     | SLNLKSEEFRTF                          | VFTETVFTCTRTAYQNQLITRLKIDS   |
| Amphi-Tbx20          | SMHRYQPRVHII | KKKEHTA---     | SLNLNSEEFTF                           | VFVQECMFTAVTAYQNQLITKLKIDS   |
| TBX2                 | SMHKYQPRFHIV | RANDILK-----   | LPYSTFRTYVFP                          | ETDFIAVTAYQNDKITQLKIDN       |
| tbx2a                | SMHKYQPRFHIV | RANDILK-----   | LPYSTFRTYVFP                          | ETDFIAVTAYQNDKITQLKIDN       |
| tbx2b                | SMHKYQPRFHIV | RANDILK-----   | LPYSTFRTYVFP                          | ETDFIAVTAYQNDKITQLKIDN       |
| TBX3                 | SMHKYQPRFHIV | RANDILK-----   | LPYSTFRTYLFP                          | ETEFIAVTAYQNDKITQLKIDN       |
| tbx3a                | SMHKYQPRFHIV | RANDILK-----   | LPYSTFRTYVFP                          | ETDFIAVTAYQNDKITQLKIDH       |
| tbx3b                | SMHKYQPRFHIV | RANDVLK-----   | LPYSTFKTYVFP                          | ETEFIAVTAYQNEKITQLKIDN       |
| Amphi-Tbx2/3         | SMHKYQPRFHIV | KTNDIMK-----   | LPYCHFRTYVFR                          | ETAFIAVTAYQNEKITQLKIDH       |
| TBX4                 | SMHKYQPRLHIV | KADENNA-----   | FGSKNTAFCTH                           | VFPETSFISVTSYQNHKITQLKIEN    |
| tbx4                 | SMHKYQPRLHIV | KADENNA-----   | FGSKNTAYCTH                           | VFHETAFISVTSYQNHKITQLKIEN    |
| TBX5                 | SMHKYQPRLHIV | KADENNG-----   | FGSKNTAFCTH                           | VFPETAFIAVTSYQNHKITQLKIEN    |
| tbx5a                | SMHKYQPRIHIV | KADENNG-----   | FGSKNTAFCTH                           | VFPETAFIAVTSYQNHKITQLKIEN    |
| tbx5b                | SMHKYQPRLHIV | KADERN-----    | FGSSNTSFC                             | THSFAETTFIAVTSYQNHKITQLKIEN  |
| Amphi-Tbx4/5         | SMHKYQPRLHIV | QASENNK-----   | FELKKTCFRTF                           | IFPETEFMAVTSYQNHQITQLKIEH    |
| TBX6                 | SMHKYQPRIHLV | RAAQLCS-----   | QHWGGMASFR                            | FPETTFISVTAYQNPQITQLKIAA     |
| tbx24                | SLHRYQPRVHVI | EARDVLM-----   | WGRTQHSFTFP                           | ETQFITVTAYQNNKITELKINS       |
| Mdom-Tbx16           | SMHRYQPRFLVA | QADDLFN-----   | VCWNLFQVFS                            | FPQTVFISVTAYQNEQITQLKIDN     |
| tbx6                 | SMHKYQPRLHIV | QSPDPCT-----   | PHNPGAYLR                             | FTFPEAAFIATAYQNQEITKLKIDN    |
| tbx16                | SMHRYHPRFHIV | QADDLYS-----   | VRWSVFQTF                             | TFPETSFTAVTAYQNTKITKLKIDH    |
| MGA                  | SMHRYLPRHLV  | PAEKAVE----    | VIQLNGPGVHT                           | FTFPQTEFFAVTAYQNIQITQLKIDY   |
| mga-a                | SMHRYLPQIHII | PADKVSK---     | DILILDRPNV                            | VTLSFAQTEFFAVTAYQNLCTQLKIDY  |
| mga-b                | PMHRYQPRLYV  | APVSACLE---    | RAVPLKSPNV                            | HMTFFPKTEFYAVTSYQNPQITRLKIDC |
| Amphi-Tbx6/16        | SMHKYQPRLHIV | QANDVYS-----   | LRWNSFSTFA                            | FPETSFIATAYQNEKITQLKIDN      |
| TBX19                | SLHKYEPQVHIV | RVGSAHR-----   | MVTNCSFPET                            | QFIAVTAYQNEEITALKIKY         |
| tbx19                | SLHKYEPQIHIV | RVGGSHR-----   | MVTNISFTDT                            | QFIAVTAYQNEEITALKIKH         |
| T                    | SLHKYEPRIHIV | RVGGPQR-----   | MITSHCFPET                            | QFIAVTAYQNEEITALKIKY         |
| ntl-a                | SLHKYEPRIHIV | KVGGIQK-----   | MISSQSFPET                            | QFIAVTAYQNEEITALKIKH         |
| ntl-b                | SLHKYEPRIHIV | RVGGPQR-----   | MITTHAFPET                            | QFIAVTAYQNEEITSLIKY          |
| Amphi-Bra1           | SLHKYEPRLHII | KVGGPDN-----   | QRMVSTHTFP                            | ETQFIAVTAYQNEEITALKIKY       |
| Amphi-Bra2           | SLHKYEPRIHIV | KVGGPDN-----   | QRTLSTHTFA                            | ETQFIAVTAYQNEELTALKIKH       |
| EOMES                | SLHKYQPRLHIV | EVTEDEGV----   | EDLNESKQT                             | TFTFSETQFIAVTAYQNTDITQLKIDH  |
| eom-a                | SLHKYQPRLHIV | EVTEDEGV----   | EDMSSEAKT                             | QTFTFPENQFIAVTAYQNTDITQLKIDH |
| eom-b                | SLHKYQPRLHIV | EVSDRS-----    | ERDSNTQIF                             | SFPENQFIAVTAYQNTDITQLKIDH    |
| TBR1                 | SLHKYQPRLHV  | EVNEDGT----    | EDTSQPGRVQ                            | TFTFPETQFIAVTAYQNTDITQLKIDH  |
| tbr1a                | SLHKYQPRVHVI | EISKNE-----    | EDTSDPDGVQ                            | TFTFPETQFISVTAYQNTDITQLKIDH  |
| tbr1b                | SLHKYQPRLHV  | QVNEDEGT----   | EDTSQPGRVQ                            | TFTFPETQFIAVTAYQNTDITQLKIDH  |
| TBX21                | SLHKYQPRLHIV | EVNDGEP----    | EAACNASNTH                            | IFTFQETQFIAVTAYQNAEITQLKIDN  |
| tbx21                | SLHKYQPRLHIV | EVEDGEGT----   | EDPFLTSKT                             | QTFVFPETQFIAVTAYQNADITQLKIDH |
| Amphi-Eom/Tbr1/Tbx21 | SMHKYQPRLHII | EVSNRAG-----   | GGERVLSHS                             | FPETQFIAVTAYQNTDITQLKIDY     |
| Amphi-Tbx6d1         | SMHKYQTKII   | ISRQETDKK----  | ARSCLGDHT                             | HTFQFEETAFAVTAYQNHRVTRLKIKN  |
| Amphi-Tbx6d2         | SMHKYQPVVQVV | EADNTTD-----   | LAVAPSWQ                              | FSFPVTEFMAVSSYSDKIRKLKVDN    |

|                      |           |
|----------------------|-----------|
| TBX1                 | NPFAKGFRD |
| tbx1                 | NPFAKGFRD |
| TBX10                | NPFAKGFRE |
| tbx10                | NPFAKGFRD |
| Amphi-Tbx1/10        | NPFAKGFRD |
| TBX15                | NPFAKGFRD |
| tbx15                | NPFAKGFRD |
| TBX18                | NPFAKGFRD |
| tbx18                | NPFAKGFRD |
| TBX22                | NPFAKGFRD |
| tbx22                | NPFAKGFRE |
| Amphi-Tbx15/18/22    | NPFAKGFRD |
| TBX20                | NPFAKGFRD |
| tbx20                | NPFAKGFRD |
| Amphi-Tbx20          | NPFAKGFRD |
| TBX2                 | NPFAKGFRD |
| tbx2a                | NPFAKGFRD |
| tbx2b                | NPFAKGFRD |
| TBX3                 | NPFAKGFRD |
| tbx3a                | NPFAKGFRD |
| tbx3b                | NPFAKGFRE |
| Amphi-Tbx2/3         | NPFAKGFRD |
| TBX4                 | NPFAKGFRG |
| tbx4                 | NPFAKGFRG |
| TBX5                 | NPFAKGFRG |
| tbx5a                | NPFAKGFRG |
| tbx5b                | NPFAKGFRG |
| Amphi-Tbx4/5         | NPFAKGFRG |
| TBX6                 | NPFAKGFRE |
| tbx24                | NPFAKGFRE |
| Mdom-Tbx16           | NPFAKGFRE |
| tbx6                 | NPFAKGFRD |
| tbx16                | NPFAKGFRD |
| MGA                  | NPFAKGFRD |
| mga-a                | NPFAKGFRE |
| mga-b                | NPFMLAFRE |
| Amphi-Tbx6/16        | NPFAKGFRD |
| TBX19                | NPFAKAFLD |
| tbx19                | NPFAKAFLD |
| T                    | NPFAKAFLD |
| ntl-a                | NPFAKAFLD |
| ntl-b                | NPFAKAFLD |
| Amphi-Bra1           | NPFAKAFLD |
| Amphi-Bra2           | NPFAKAFLD |
| EOMES                | NPFAKGFRD |
| eom-a                | NPFAKGFRD |
| eom-b                | NPFAKGFRD |
| TBR1                 | NPFAKGFRD |
| tbr1a                | NPFAKGFRD |
| tbr1b                | NPFAKGFRD |
| TBX21                | NPFAKGFRE |
| tbx21                | NPFAKGFRD |
| Amphi-Eom/Tbr1/Tbx21 | NPFAKGFRD |
| Amphi-Tbx6d1         | NPFAKAFRD |
| Amphi-Tbx6d2         | NKFAKNLRN |

**Figure S4.** Exon-intron structures of the T-box regions of vertebrate T-box genes included in the phylogenetic analysis (Figures 1 & S3). Sequences are organized by sub-family memberships and shown in an interleaved format. Alignment gaps are as in Fig. S2. Except for the *Mga* genes, which are intron-less in the T-box region (Hurlin et al. 1999), the T-domains of vertebrate T-box genes are encoded by 4 or 5 exons, which have diagnostic differences in their sizes and numbers as well as in the codon positions of exon-intron junctions (Wattler et al. 1998). The portions of T-domains encoded by different exons are shown in **violet**, **cyan**, **blue**, **black**, and **green** colors. The residues whose codons are split between neighboring exons are indicated by **red** and **brown** colors, in which the **red** color means that the codon is split between the 2nd & 3rd bases (e.g., AG-A) while the **brown** color indicates that the codon is split between the 1st & 2nd bases (e.g., A-GA). Note that, in terms of the exon-intron structure of the T-box regions, the *Tbx6/16* sub-family of vertebrate T-box genes can be sub-divided further into three groups of genes: 1) *Tbx16*-like genes containing 5-exon T-boxes; 2) *Tbx6*-like genes containing 4-exon T-boxes; and 3) *Mga*-like genes containing single-exon T-boxes.

```
>TBX15      LWKRFHDIGTEMIITKAGRMFFPAMRVKITGLDPHQQYYIAMDIVPVDNKRYVYHSSKWMVAGNADSP-VP-PRVYIHPDSLASGDTWMRQV
>tbx15      LWKRFHDIGTEMIITKAGRMFFPAMRVKITGLDPHQQYYIAMDIVPVDNKRYVYHSSKWMVAGNADSP-VP-PRVYIHPDSLASGDTWMRQV
>TBX18      LWKRFHEIGTEMIITKAGRMFFPAMRVKISGLDPHQQYYIAMDIVPVDNKRYVYHSSKWMVAGNADSP-VP-PRVYIHPDPASGETWMRQV
>tbx18      LWKRFHEIGTEMIITKAGRMFFPAMRVKISGLDPHQQYYIAMDIVPVDNKRYVYHSSKWMVAGNADSP-VP-PRVYIHPDPASGETWMRQV
>TBX22      LWKRFHDIGTEMIITKAGRMFFPSVRVKIGLDPGKQYHVAIDVVPVDSKRYVYHSSQWMVAGNTDHLCIIPR-FYVHPDPCSGETWMRQI
>tbx22      LWKRFYEIGTEMIITKVGRMFFPSVRVKHNLDPLQQYSIAMDIMPDSKRYVYHSSQWVIAGNTDHSCIP-PHLYVHPDPCSGENWMRQV

>TBX20      LWDKFHELGTEMITKSGRMFFPTIRVSFSGVDPEAKYIVLMDIVPVDNKRYAYHRSSWLVAGKADPP-LP-ARLYVHPDSPTGEQLLKQM
>tbx20      LWDKFHELGTEMITKSGRMFFPTIRVSFSGVDPDAKYIVLMDIVPVDNKRYAYHRSSWLVAGKADPP-LP-ARLYVHPDSPTGEQLLKQM

>TBX1       LWDEFNQLGTEMIVTKAGRMFFPTQVKIFGMDPADYMLLMDIFPVDDKRYAFHSSSWLVAGKADPA-TP-GRVYHHPDSPAKGAQWMQI
>tbx1       LWDEFNQLGTEMIVTKAGRMFFPTQVKIFGMDPADYMLLMDIFPVDDKRYAFHSSSWLVAGKADPA-TP-GRVYHHPDSPAKGAQWMQI
>TBX10      LWDEFNQLGTEMIVTKAGRMFFPQVKILGMDSLADYALLMDIFPLDDKRYAFHSSAWLVAGKADPA-TP-GRVYHHPDSPAKGAQWMQI
>tbx10      LWRQFDQLGTEMIVTKAGRMFFPTQVHISGMDPAEYVLLMDIFPVDDKRYAFHSSSWLVAGRGDVA-AP-GRVYHHPDSPARGAQWIKQT

>TBX2       LWDQFHKLGTEMITKSGRMFFPPFKVRVSGLDKKAKYILLMDIVAADDCRYK--FHNSRWMVAGKADPE-MP-KRMYIHPDSPATGEQWMAKP
>tbx2a      LWDQFHKIGTEMITKSGRMFFPPFKVRVNGLDKKAKYILLMDIVAADDCRYK--FHNSRWMVAGKADPE-MP-KRMYIHPDSPATGEQWMAKP
>tbx2b      LWDQFHKLGTEMITKSGRMFFPPFKVRINGLDKKAKYILLMDIVAADDCRYK--FHNSRWMVAGKADPE-MP-KRMYIHPDSPATGEQWMAKP
>TBX3       LWDQFHKRGTEMITKSGRMFFPPFKVRCSGLDKAKYILLMDIIAADDCRYK--FHNSRWMVAGKADPE-MP-KRMYIHPDSPATGEQWMSKV
>tbx3a      LWELFHKRGTEMITKSGRMFFPPFKVRCTGLDKAKYILLMDIVAADDCRYK--FHNSRWMVAGKADPE-MP-KRMYIHPDSPATGEQWMSKV
>tbx3b      LWGQFHKVGTEMITKSGRMFFPAFKVRCSGFDRKARYILLMDIVASDDYRYK--FHNCWMVAGKADPE-MP-KRMYIHPDSPTGEQWMSKA

>TBX4       LWKKFHEAGTEMIITKAGRMFFPSYKVKVTGMNPKTKYILLDIVPADDHRYK--FCDNKWMVAGKAEPA-MP-GRLYVHPDSPATGAHWMRQL
>tbx4       LWKKFHEAGTEMIITKAGRMFFPSYKVKVTGMNPKTKYILLDIVPADDHRYK--FCDNKWMVAGKAEPA-MP-GRLYVHPDSPATGAHWMRQL
>TBX5       LWLKFHEVGTEMIITKAGRMFFPSYKVKVTGLNPKTKYILLMDIVPADDHRYK--FADNKWSVTGKAEPA-MP-GRLYVHPDSPATGAHWMRQL
>tbx5a      LWLKFHEVGTEMIITKAGRMFFPSKVKVTGLNPKTKYILLMDIVPADDHRYK--FADNKWSVTGKAEPA-MP-GRLYVHPDSPATGAHWMRQL
>tbx5b      LWAKFHDVTTEMIITKAGRMFFPSYKVKVTGLNPKAKYILLMDIISADEHRYK--FADNKWSISGKAEPA-IP-GRLYVHPDSPASGAHWMRQL

>Mdom-Tbx16 LWTEFYRVGTEMIVTKSGRMFFPQCKIRLSGLVPYLKYVVLADFVSVDNFRYK--WAKDQWEVAGKAEPQ-LP-GRSYIHPDSPAYGSHWMKEP
>tbx16      LWSRFHEIGTEMIITKPGRMFFPCHKISLSGLVPYAKYILLVDMVPEDGLRYK--WNKDKEVAGKAEPQ-PP-YRTYLHPDSPAPGSHWMQKP
>tbx6       LWDKFSSIGTEMITKSGRMFFPCKVTVTGLNPKYVYVIMDVPFDNHKYK--WNKDCWEVNGSSDPH-LP-NRFFIHPDSPAPGQWMQYP
>TBX6       LWKEFSSVGTEMIITKAGRMFFPACRVSVTGLDPEARYLFLLDVPVDGARYR--WQGRRWEPSGKAEPR-LP-DRVYIHPDSPATGAHWMRQP
>tbx24      LWKQFSTVGTEMITKKGRMFFPQLRVKLSGLNPSLRYILLLDIVPVDSSRYR--FQDNSWQVVGGAEAR-LP-DRVFIHPDSPATGEHWQNRT
>MGA        MWNEFYHRSTEMILTKQRRMFPYCRYWITGLDSNLKYILVMDISPDNHRYK--WNGRWEPSGKAEPH-VL-GRVFIHPESPSTGHYWMHQP
>mga-a      MWNEFHRCKTEMILTKQRRMFPYCRFLSGMEPFQNYVLAMDIKPADNCRYK--WSGKGWEPNGKAEPH-I--SRLFVHPESPASGLHWMQYP
>mga-b      VWSRFHSLGTEMLLTPQRRMFPCRFLRGLDPLQYFLMDIAPLDLLRH--FNGEAWEPDGPGEAH-LQ-SPVCFHPDSPAVGQHWMDSP

>EOMES      LWLKFHRHQTEMIITKQGRRMFFPLSFNINGLNPTAHYNVFVEVLADPNHWR--FQGGKWVTCGKADNN-MQGNKMYVHPESPNTGSHWMRQE
>eom-a      LWLKFHRHQTEMIITKQGRRMFFPLSFNITGLNLTAHYNVFVEIVLADPNHWR--FQGGKWVTCGKADNN-MQGNKVYVHPESPNTGAHWMRQE
>eom-b      LWLKFHRHQTEMIITKQGRRMFFPLSFNMTGLSLSAHYNVFVEIVLADPNHWR--FQGGKWVTCGKADNN-MQGNKIYMHPESPNTGAHWMRQE
>TBR1       LWLKFHRHQTEMIITKQGRRMFFPLSFNISGLDPTAHYNIFVDVILADPNHWR--FQGGKWVPCGKADTN-VQGNRVYMHPDSNTGAHWMRQE
>tbr1a      LWFKFHRHQTEMIITKQGRRMFFPCLTFNSGLDPAGHYNIAVDVLADPNHWR--FQGGKWVPCGKADTN-VTGNRVYTHPDSNTGAHWMRQE
>tbr1b      LWLKFHRHQTEMIITKQGRRMFFPLSFNISGLDPTAHYNIFVDVILADPNHWR--FQGGKWVPCGKADTN-VTGNRVYMHPDSNTGAHWMRQE
>TBX21      LWSKFNQHQTEMIITKQGRRMFFPLSFTVAGLEPTSHYRMFVDVVLVDQHHWR--YQSGKWVQCGKAEGS-MPGNRLYVHPDSPNTGAHWMRQE
>tbx21      LWAKFHKYQTEMIITKQGRRMFFPLSFNITSLDPSAHYNIYDVVVLADQHHWR--YQGGKWVQCGKAEGN-MPGNRMVHPDSNTGTHWMRQE

>TBX19      LWQRFKEVTNEMITKNGRMFFPVLKISVTGLDPNAMYSLLLDFVPTDSHRWK--YVNGEWVPAGKPEVS-SH-SCVYIHPDSPNFGAHWMKAP
>tbx19      LWRKFKEVTNEMITKNGRMFFPVLKSVTGLDPNAMYSFLLDFTPADGHRWK--YVNGEWVPAGKPEPH-SH-SCVYIHPDSPNFGAHWMKAP
>T          LWRKFKEVTNEMITKNGRMFFPVLKVNSGLDPNAMYSFLLDFVAADNHRWK--YVNGEWVPGGKPEPQ-AP-SCVYIHPDSPNFGAHWMKAP
>ntl1-a     LWTKFKELTNEMITKTGRMFPVLRASVTGLDPNAMYSVLLDFVAADNNRWK--YVNGEWVPGGKPEPQ-SP-SCVYIHPDSPNFGAHWMKAP
>ntl1-b     LWQKFKALTNEMITKNGRMFFPVLKVISGLDPNAMYSFLLDFPADNHRWK--YVNGEWVPGGKPEPQ-AP-SCVYIHPDSPNFGAHWMKSC
```

>TBX15 VSFDKLKLTTNN---ELDDQGHIIILHSMHKYQPRVHVIRKDFSSDLSPTKPVVGDGVKTFNFPETVFTTVTAYQNQQ ITRCLKIDRNPPFAKGFRD  
 >tbx15 VSFDKLKLTTNN---ELDDQGHIIILHSMHKYQPRVHVIRKDFSSDLSPTKPVVGDGVKTFNFPETVFTTVTAYQNQQ ITRCLKIDRNPPFAKGFRD  
 >TBX18 ISFDKLKLTTNN---ELDDQGHIIILHSMHKYQPRVHVIRKDCGDDLSPIKPVPSGEGVKAFFSPETVFTTVTAYQNQQ ITRCLKIDRNPPFAKGFRD  
 >tbx18 ISFDKLKLTTNN---ELDDQGHIIILHSMHKYQPRVHVIRKECGEELSPVKAAPTGDGVKAFFSETVFTTVTAYQNQQ ITRCLKIDRNPPFAKGFRD  
 >TBX22 ISFDRMKLTTNN---EMDDKGHIIILQSMHKYQPRVHVIEQSSVDLSQ-IQSLPTEGVKTFSEKETEFTTVTAYQNQQ ITKLKIERNPPFAKGFRD  
 >tbx22 ISFDRVKLTTNN---ELDDRGIILKSMHKYRPIRHHVILHCPPECLSKRLLSLPADGVFTFSFPETQFTTVTAYQNQQ ITKLKIERNPPFAKGFRD  
  
 >TBX20 VSFEKVKLTTNN---ELDQGHIIILNSMHKYQPRVHIKKKDHTA---SLLNLKSEEFRTFIFPETVFTAVTAYQNQL ITKLKIDSNPPFAKGFRD  
 >tbx20 VSFEKVKLTTNN---ELDQGHIIILNSMHKYQPRVHIKKKDHTA---SLLNLKSEEFRTFVFETVFTAVTAYQNQL ITRCLKIDSNPPFAKGFRD  
  
 >TBX1 VSFDKLKLTTNN---LLDDNGHIIILNSMHRYQPRFHVVVDPRKD----SEKYAEENFKTFVFEETRFTAVTAYQNHR ITQLKIASNPPFAKGFRD  
 >tbx1 VSFDKLKLTTNN---LLDDNGHIIILNSMHRYQPRFHVVVDPRKD----SEKYAEENFKTFVFEETRFTAVTAYQNHR ITQLKIASNPPFAKGFRD  
 >TBX10 VSFDKLKLTTNN---LLDDNGHIIILNSMHRYQPRFHVVVDPRKD----SERVAQENFKSFIETETQFTAVTAYQNHR ITQLKIASNPPFAKGFRD  
 >tbx10 VSFDRKLKLTTNN---LLDDNGHIIILNSMHRYQPRHLVVLVDRSRN----SQFAHRNFCTFSFPETRFIAVTAYQNHR ITQLKIACNPPFAKGFRD  
  
 >TBX2 VAFHKLKLTTNN---ISDKHGFIIILNSMHKYQPRFHIVRANDILK-----LPYSTFRITYVFPETDFIAVTAYQNDK ITQLKIDNNPPFAKGFRD  
 >tbx2a VAFHKLKLTTNN---ISDKHGFIIILNSMHKYQPRFHIVRANDILK-----LPYSTFRITYVFPETDFIAVTAYQNDK ITQLKIDNNPPFAKGFRD  
 >tbx2b VAFHKLKLTTNN---ISDKHGFIIILNSMHKYQPRFHIVRANDILK-----LPYSTFRITYVFPETDFIAVTAYQNDK ITQLKIDNNPPFAKGFRD  
 >TBX3 VTFHKLKLTTNN---ISDKHGFIIILNSMHKYQPRFHIVRANDILK-----LPYSTFRITYVFPETDFIAVTAYQNDK ITQLKIDNNPPFAKGFRD  
 >tbx3a VNFHKLKLTTNN---ISDKHGFIIILNSMHKYQPRFHIVRANDILK-----LPYSTFRITYVFPETDFIAVTAYQNDK ITQLKIDNNPPFAKGFRD  
 >tbx3b VTFHKLKLTTNN---ISDKHGFIIILNSMHKYQPRFHIVRANDVLK-----LPYSTFKITYVFPETDFIAVTAYQNEK ITQLKIDNNPPFAKGFRD  
  
 >TBX4 VSFQKLKLTTNN---HLDPPFGHIIILNSMHKYQPRHLHIVKADENNA-----FGSKNTAFCTHVFPETSFISVTSYQNHK ITQLKIENNPPFAKGFRG  
 >tbx4 VSFQKLKLTTNN---HLDPPFGHIIILNSMHKYQPRHLHIVKADENNA-----FGSKNTAYCTHVPHETAFISVTSYQNHK ITQLKIENNPPFAKGFRG  
 >TBX5 VSFQKLKLTTNN---HLDPPFGHIIILNSMHKYQPRHLHIVKADENNG-----FGSKNTAFCTHVFPETAFIAVTAYQNHK ITQLKIENNPPFAKGFRG  
 >tbx5a VSFQKLKLTTNN---HLDPPFGHIIILNSMHKYQPRIHIVKADENNG-----FGSKNTAFCTHVFPETAFIAVTAYQNHK ITQLKIENNPPFAKGFRG  
 >tbx5b VSFQKLKLTTNN---HLDPPFGHIIILNSMHKYQPRHLHIVKADERN-----FGSSNTSFCTHSFAETTFIAVTAYQNH ITQLKIENNPPFAKGFRG  
  
 >Mdom-Tbx16 VSFHKMKLTTNN---TLDQGHIIILNSMHRYQPRFLVAQADDLFN-----VCWNLFQVFSFPQTVFISVTAYQNEQ ITKLKIDNNPPFAKGFRD  
 >tbx16 VSFKLKLKLTTNN---ALDQGHIIILNSMHRYQPRFHIVQADDLYS-----VRWSVFQTFTFPETSFTAVTAYQNTK ITKLKIDNNPPFAKGFRD  
 >tbx6 VSFHKLKLTTNN---TLNSNGLVVLHSMHKYQPRHLHIVQSPDPCT-----PHNPGAYLRFTFPEAAFIATVAYQNQE ITKLKIDNNPPFAKGFRD  
 >TBX6 VSFHRVKLTNS---TLDPHGHLIILHSMHKYQPRHLHIVRAAQLCS-----QHWGGMASFRFPETTFISVTAYQNQP ITQLKIAANPPFAKGFRD  
 >tbx24 ISFHRAKLTTNN---TLDAQGYIIILHSLHRYQPRVHVIEARDVLM-----WGRTOHSFTFPETQFIVTAYQNNK ITTELKINSNPPFAKGFRD  
 >MGA VSFYKLKLTTNN---TLDQEGHIIILNSMHRYLPRHLHIVPAEKAVE---VIQLNGPGVHTFTFPQTEFFAVTAYQNIQITQLKIDYNPPFAKGFRD  
 >mga-a VSFYRLKLCNT---LDQEGHIIILNSMHRYLPQIHIIIPADKVS---DILILDRPNVVTLSFAQTEFFAVTAYQNL CITQLKIDYNPPFAKGFRD  
 >mga-b VSFYTVKLTHD---SCEREG-VLLQPMHRYQPRLYVAPVSACLE---RAVPLKSPNVHMTFPKTEFYAVTSYQNPQITRLKIDCNPFMLAFRE  
  
 >EOMES ISFGKLKLTTNNKGANNNTQMIVLQSLHKYQPRHLHIVEVTEDEGV---EDLNEPSKTQTFTFSETQFIAVTAYQNTD ITQLKIDHNPPFAKGFRD  
 >eom-a ISFGKLKLTTNNKGANNNTQMIVLQSLHKYQPRHLHIVEVTEDEGV---EDMSSEAKTQTFTFPENQFIAVTAYQNTD ITQLKIDHNPPFAKGFRD  
 >eom-b ISFGKLKLTTNNKGANNINTSQMIVLQSLHKYQPRHLHIVEVSDRS-----ERDSNTQIFSFPENQFIAVTAYQNTD ITQLKIDHNPPFAKGFRD  
 >TBR1 ISFGKLKLTTNNKGASNNNQMVVLQSLHKYQPRHLHVVEVNEDEGT---EDTSQPGRVQTFTFPETQFIAVTAYQNTD ITQLKIDHNPPFAKGFRD  
 >tbr1a ISFGKLKLTTNNKGASNNNTQMIVLQSLHKYQPRVHVIEISKNEDE---EDTSDPDGVQTFTFPETQFISVTAYQNTD ITQLKIDHNPPFAKGFRD  
 >tbr1b ISFGKLKLTTNNKGATNNNTQMIVLQSLHKYQPRHLHVQVNEDEGT---EDTSQPGRVQTFTFPETQFIAVTAYQNTD ITQLKIDHNPPFAKGFRD  
 >TBX21 VSFGLKLKLTTNNKGASNNVTQMIVLQSLHKYQPRHLHIVEVNDGEP---EAACNASNTHIFTFQETQFIAVTAYQNAE ITQLKIDNNPPFAKGFRD  
 >tbx21 VSFGLKLKLTTNNKGSSNNVAQMIVLQSLHKYQPRHLHIVEVKEDEGT---EDPFLTSKTQTFVFPETQFIAVTAYQNAE ITQLKIDHNPPFAKGFRD  
  
 >TBX19 ISFSKVKLTKN---LNGGGQ-IMLNSLHKYEPQVHIVRVGSAHR-----MVTNCSFPETQFIAVTAYQNEE ITALKIKYNPPFAKAFLD  
 >tbx19 VSFNKVKLTKN---LNGGGQ-IMLNSLHKYEPQIHIVRVGSSHR-----MVTNISFTDTQFIAVTAYQNEE ITALKIKHNPPFAKAFLD  
 >T VSFSKVKLTKN---LNGGGQ-IMLNSLHKYEPRIHIVRVGGPQR-----MITSHCFPETQFIAVTAYQNEE ITALKIKYNPPFAKAFLD  
 >ntl-a VSFSKVKLSNK---LNGGGQ-IMLNSLHKYEPRIHIVKVGGIQK-----MISSQSFPETQFIAVTAYQNEE ITALKIKHNPPFAKAFLD  
 >ntl-b VSFSKVKLTKN---LNGGGQ-IMLNSLHKYEPRIHIVRVGGPQR-----MITTHAFPETQFIAVTAYQNEE ITSLKIKYNPPFAKAFLD

### Supplementary Materials References

- Hurlin PJ, Steingrimsson E, Copeland NG, Jenkins NA, Eisenman RN. 1999. *Mga*, a dual-specificity transcription factor that interacts with *Max* and contains a T-domain DNA-binding motif. *EMBO J* 18: 7019-7028.
- Wattler S, Russ A, Evans M, Nehls M. 1998. A combined analysis of genomic and primary protein structure defines the phylogenetic relationship of new members of the T-box family. *Genomics* 48: 24-33.
